# Supplementary material for: Iridium/copper-cocatalyzed asymmetric ring opening reaction of azabenzonorbornadienes with amines
Source: Royal Society of Chemistry journal article supplement (doi:10.1039/c5ob01243k), 2015-01-01
Supplement: c5ob01243k1.pdf [file c5ob01243k1.pdf]

# **Iridium/Copper-Cocatalyzed Asymmetric Ring Opening Reaction of Azabenzonorbornadienes with Amines**

Chaoyuan Zeng,<sup>a</sup> Fan Yang,<sup>a</sup> Jingchao Chen,<sup>a</sup> Jun Wang,<sup>\*b</sup> and Baomin Fan<sup>\*a</sup>

<sup>a</sup> YMU-HKBU Joint Laboratory of Traditional Natural Medicine, Yunnan Minzu University, Kunming 650500, China  
Fax: (+86)-871-65913103, E-mail: adams.bmf@hotmail.com

<sup>b</sup> Department of Chemistry, South University of Science and Technology of China, Shenzhen, Guangdong, 518055, China.

Fax: (+86)-755-88018304, E-mail: wang.j@sustc.edu.cn.

## ***Supporting Information***

### **Contents**

|                                              |            |
|----------------------------------------------|------------|
| <b>A: General method</b>                     | <b>S2</b>  |
| <b>B: Typical procedure for the reaction</b> | <b>S3</b>  |
| <b>C: Characterization Data of Products</b>  | <b>S4</b>  |
| <b>D: HPLC Spectra</b>                       | <b>S12</b> |
| <b>E: Copies of NMR spectra</b>              | <b>S32</b> |

## A: General method

The reactions and manipulations were performed under an atmosphere of argon by using standard Schlenk techniques and Drybox (Mikrouna, Supper 1220/750). Anhydrous toluene, DME (Dimethoxyethane), THF (Tetrahydrofuran), MTBE (Methyl *tert*-butyl ether), ether and dioxane were distilled from sodium benzophenone ketyl prior to use. Anhydrous DCE (sym-Dichloroethane), CH<sub>3</sub>CN (acetonitrile) and DMAc (Dimethylacetamide) were distilled from calcium hydride and stored under argon. <sup>1</sup>H NMR and <sup>13</sup>C NMR spectra were recorded on Bruker-Avance 400 MHz spectrometer. CDCl<sub>3</sub> was used as solvent. Chemical shifts ( $\delta$ ) were reported in ppm with tetramethylsilane as internal standard, and *J* values were given in Hz. The enantioselective excesses were determined by Agilent 1260 Series HPLC using Daicel AD-H、OD-H chiral columns eluted with a mixture of isopropyl alcohol and hexane.. Column chromatography was performed with silica gel (200-300 mesh).

## B: Typical procedure for the reaction

[Ir(COD)Cl]<sub>2</sub> (3.4 mg, 0.005 mmol), (*R*)-Difluorophos (8.2 mg, 0.012 mmol) and 1.0 mL toluene were added to a Schlenk tube in argon atmosphere. The resulting solution was stirred at room temperature for 30 min, then CuBr (5.8 mg, 0.04mmol) was added and stirred for additional 10 min, then a solution of *N*-Boc-azabenzonorbornadiene **1a** (48.6 mg, 0.2mmol) in toluene(1 mL) was added, and the mixture was stirred for additional 10 min. After the addition of aminobenzene **2a** (55.8 mg, 0.6mmol) and 1.0mL toluene, the mixture was stirred at 70 °C under argon atmosphere with TLC monitoring until the complete consumption of **1a**. The reaction mixture was concentrated. The residue was purified by chromatography on a silica gel column to afford the desired product **3aa** (65.2mg, 97% yield). The enantioselective excess value of the product was determined by HPLC on a chiral stationary phase (95% ee).

## C: Characterization Data of Products

### 2-(Phenylamino)-1,2-dihydronaphthalen-1-yl-carbamic acid *tert*-butyl ester

#### (3aa)

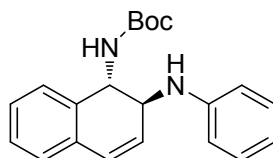

White solid, 97% yield, 95% *ee*.  $^1\text{H}$  NMR (400 MHz,  $\text{CDCl}_3$ ):  $\delta$  7.24-7.04 (m, 6H), 6.64-6.62 (d,  $J = 7.2\text{Hz}$ , 3H), 6.49-6.47 (d,  $J = 9.6\text{Hz}$ , 1H), 6.20-5.98 (dd,  $J = 9.6, 4.4\text{Hz}$ , 1H), 4.98-4.96 (t,  $J = 8\text{Hz}$ , 1H), 4.67-4.65 (d,  $J = 8.4\text{Hz}$ , 1H), 4.19 (s, 1H), 3.78 (s, 1H), 1.38 (s, 9H). The *ee* of **3aa** was determined by HPLC analysis using Daicel Chiralcel AD-H column (25 cm  $\times$  0.46 cm ID), conditions: n-hexane/*i*-PrOH = 90/10, 1.0 mL/min, 254 nm;  $t_{\text{minor}} = 7.1$  min,  $t_{\text{major}} = 11.5$  min.

### 2-(4-Bromophenylamino)-1,2-dihydro-naphthalen-1-yl-carbamic acid *tert*-butyl ester (3ac)

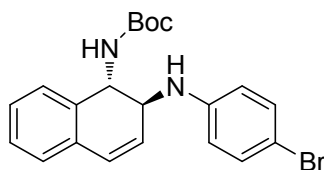

White solid, 96% yield, 95% *ee*.  $^1\text{H}$  NMR (400 MHz,  $\text{CDCl}_3$ ):  $\delta$  7.31-7.21 (m, 5H), 7.15-7.13 (d,  $J = 7.2\text{Hz}$ , 1H), 6.64-6.57 (dd,  $J = 17.6, 8.4\text{Hz}$ , 3H), 6.07-6.04 (dd,  $J = 14.0, 4.4\text{Hz}$ , 1H), 5.01-4.97 (t,  $J = 14.4\text{Hz}$ , 1H), 4.72-4.69 (d,  $J = 9.2\text{Hz}$ , 1H), 4.24 (s, 1H), 3.67 (s, 1H), 1.45 (s, 9H). The *ee* of **3ab** was determined by HPLC analysis using Daicel Chiralcel AD-H column (25 cm  $\times$  0.46 cm ID), conditions: n-hexane/*i*-PrOH = 85/15, 1.0 mL/min, 254 nm;  $t_{\text{minor}} = 6.3$  min,  $t_{\text{major}} = 11.5$  min.

### 2-(3-Bromophenylamino)-1,2-dihydro-naphthalen-1-yl-carbamic acid *tert*-butyl ester (3ab)

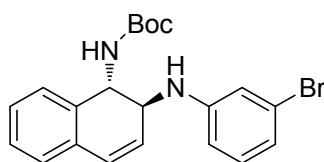

White solid, 95% yield, 91% *ee*.  $^1\text{H}$  NMR (400 MHz,  $\text{CDCl}_3$ )  $\delta$  7.33-7.21 (m, 3H), 7.15-7.13 (d,  $J = 7.2\text{Hz}$ , 1H), 7.05-7.01 (t,  $J = 8\text{Hz}$ , 1H), 6.82-6.80 (d,  $J = 8\text{Hz}$ , 2H),

6.70-6.68 (d,  $J = 7.6\text{Hz}$ , 1H), 6.58-6.56 (d,  $J = 9.6\text{Hz}$ , 1H), 6.06-6.02 (dd,  $J = 9.6, 4.0\text{Hz}$ , 1H), 5.03-5.00 (t,  $J = 8\text{Hz}$ , 1H), 4.73 (d,  $J = 8.8\text{Hz}$ , 1H), 4.24 (d,  $J = 5.2\text{Hz}$ , 1H), 3.95 (s, 1H), 1.46 (s, 9H).  $^{13}\text{C}$  NMR ( $\text{CDCl}_3$ , 100MHz):  $\delta$  156.02, 148.11, 133.63, 132.41, 130.74, 128.94, 128.61, 128.39, 127.89, 127.76, 127.03, 123.33, 120.27, 115.86, 111.68, 80.06, 53.63, 52.33, 28.39. HRMS ( $\text{EI}^+$ ): calcd for  $\text{C}_{21}\text{H}_{23}\text{BrN}_2\text{O}_2$   $[\text{M}]^+$ : 414.0943, Found: 414.0938. The *ee* of **3ac** was determined by HPLC analysis using Daicel Chiralcel AD-H column (25 cm  $\times$  0.46 cm ID), conditions: n-hexane/*i*-PrOH = 90/10, 1.0 mL/min, 254 nm;  $t_{\text{minor}} = 6.5$  min,  $t_{\text{major}} = 13.8$  min.

**2-(4-Chlorophenylamino)-1,2-dihydro-naphthalen-1-yl-carbamic acid *tert*-butyl ester (3ad)**

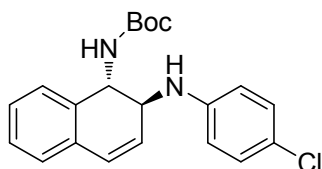

White solid, 96% yield, 94% *ee*.  $^1\text{H}$  NMR (400 MHz,  $\text{CDCl}_3$ )  $\delta$  7.31-7.21 (m, 3H), 7.15-7.11 (t,  $J = 14.0\text{Hz}$ , 3H), 6.67-6.56 (dd,  $J = 32.0, 8.0\text{Hz}$ , 3H), 6.07-6.04 (dd,  $J = 9.6, 4.4\text{Hz}$ , 1H), 5.01-4.97 (t,  $J = 14.4\text{Hz}$ , 1H), 4.71 (d,  $J = 8.8\text{Hz}$ , 1H), 4.23 (s, 1H), 3.85 (s, 1H), 1.45 (s, 9H). The *ee* of **3ad** was determined by HPLC analysis using Daicel Chiralcel AD-H column (25 cm  $\times$  0.46 cm ID), conditions: n-hexane/*i*-PrOH = 85/15, 1.0 mL/min, 254 nm;  $t_{\text{major}} = 6.4$  min,  $t_{\text{minor}} = 11.6$  min.

**2-(*p*-Tolylamino)-1,2-dihydro-naphthalen-1-yl-carbamic acid *tert*-butyl ester (3ae)**

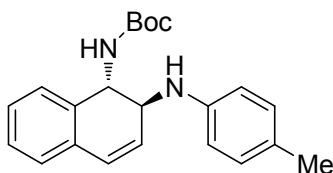

White solid, 97% yield, 93% *ee*.  $^1\text{H}$  NMR (400 MHz,  $\text{CDCl}_3$ )  $\delta$  7.29-7.17 (m, 3H), 7.11-7.10 (d,  $J = 7.2\text{Hz}$ , 1H), 7.00-6.98 (d,  $J = 6.8\text{Hz}$ , 2H), 6.63-6.61 (d,  $J = 7.2\text{Hz}$ , 2H), 6.54-6.51 (d,  $J = 9.6\text{Hz}$ , 1H), 6.08-6.04 (dd,  $J = 9.2, 3.2\text{Hz}$ , 1H), 5.01-5.00 (d,  $J = 6.4\text{Hz}$ , 1H), 4.78-4.76 (d,  $J = 8.8\text{Hz}$ , 1H), 4.22 (s, 1H), 3.64 (s, 1H), 2.22 (s, 3H), 1.44 (s, 9H). The *ee* of **3ae** was determined by HPLC analysis using Daicel Chiralcel

AD-H column (25 cm × 0.46 cm ID), conditions: n-hexane/*i*-PrOH = 90/10, 1.0 mL/min, 254 nm;  $t_{\text{minor}} = 7.9\text{min}$ ,  $t_{\text{major}} = 10.1\text{ min}$ .

**2-(4-Methoxyphenylamino)-1,2-dihydro-naphthalen-1-yl-carbamic acid *tert*-butyl ester (3af)**

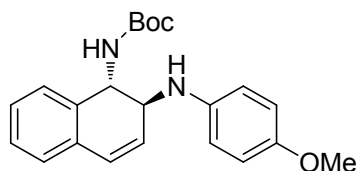

White solid, 97% yield, 94% *ee*.  $^1\text{H NMR}$  (400 MHz,  $\text{CDCl}_3$ )  $\delta$  7.22-7.11 (m, 3H), 7.05 (d,  $J = 7.6\text{Hz}$ , 1H), 6.71-6.69 (d,  $J = 8.8\text{Hz}$ , 2H), 6.61-6.59 (d,  $J = 8.8$ , 2H), 6.47-6.45 (d,  $J = 9.6\text{Hz}$ , 1H), 6.01-5.98 (dd,  $J = 9.6, 4.8\text{Hz}$ , 1H), 4.94-4.91 (t,  $J = 14.8\text{Hz}$ , 1H), 4.69-4.67 (d,  $J = 8.8\text{ Hz}$ , 1H), 4.12-4.10 (t,  $J = 4.8\text{Hz}$ , 1H), 3.65 (s, 3H), 3.55 (s, 1H), 1.37 (s, 9H). The *ee* of **3ai** was determined by HPLC analysis using Daicel Chiralcel AD-H column (25 cm × 0.46 cm ID), conditions: n-hexane/*i*-PrOH = 85/15, 1 mL/min, 254 nm;  $t_{\text{minor}} = 8.3\text{ min}$ ,  $t_{\text{major}} = 10.8\text{ min}$ .

**2-[(4-Bromophenyl)methylamino]-1,2-dihydronaphthalen-1-yl-carbamic acid *tert*-butyl ester (3ai)**

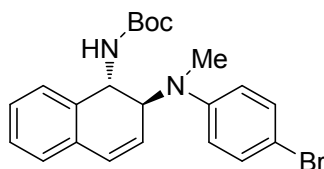

White solid, 83% yield, 94% *ee*.  $^1\text{H NMR}$  (400 MHz,  $\text{CDCl}_3$ )  $\delta$  7.32-7.21 (m, 5H), 7.11-7.09 (d, 1H), 6.73-6.71 (d,  $J = 9.2\text{Hz}$ , 2H), 6.63-6.60 (dd,  $J = 2.0, 8.0\text{Hz}$ , 1H), 5.90-5.86 (dd,  $J = 2.8, 10.0\text{Hz}$ , 1H), 5.18-5.13 (t,  $J = 10.0\text{Hz}$ , 1H), 4.74-4.72 (d,  $J = 10.0\text{Hz}$ , 1H), 4.51-4.49 (d,  $J = 9.6$ , 1H), 2.79 (s, 3H), 1.34 (s, 9H). The *ee* of **3ag** was determined by HPLC analysis using Daicel Chiralcel AD-H column (25 cm × 0.46 cm ID), conditions: n-hexane/*i*-PrOH = 95/5, 1.0 mL/min, 254 nm;  $t_{\text{minor}} = 7.9\text{ min}$ ,  $t_{\text{major}} = 8.8\text{ min}$ .

**2-(Methylphenylamino)-1,2-dihydronaphthalen-1-yl-carbamic acid *tert*-butyl ester (3ah)**

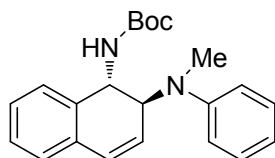

White solid, 94% yield, 95% *ee*.  $^1\text{H}$  NMR (400 MHz,  $\text{CDCl}_3$ )  $\delta$  7.34 (d,  $J = 6.4\text{Hz}$ , 1H), 7.33-7.20 (m, 4H), 7.11 (d,  $J = 7.2\text{Hz}$ , 1H), 6.86-6.84 (d,  $J = 8.0\text{Hz}$ , 2H), 6.74-6.70 (t,  $J = 14.4\text{Hz}$ , 1H), 6.62-6.60 (d,  $J = 7.6\text{Hz}$ , 1H), 5.95-5.91 (dd,  $J = 9.6, 2.4\text{Hz}$ , 1H), 5.23-5.18 (t,  $J = 10.4\text{Hz}$ , 1H), 4.81-4.78 (d,  $J = 10.8\text{Hz}$ , 1H), 4.50-4.48 (d,  $J = 9.2\text{Hz}$ , 1H), 2.84 (s, 1H), 1.34 (s, 9H). The *ee* of **3ah** was determined by HPLC analysis using Daicel Chiralcel OD-H column (25 cm  $\times$  0.46 cm ID), conditions: n-hexane/*i*-PrOH = 95/5, 1 mL/min, 254 nm;  $t_{\text{minor}} = 7.8$  min,  $t_{\text{major}} = 9.1$  min.

**2-[(4-Methoxyphenyl)methylamino]-1,2-dihydronaphthalen-1-yl-carbamic acid tert-butyl ester (3aj)**

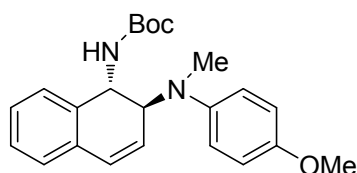

White solid, 96% yield, 95% *ee*.  $^1\text{H}$  NMR (400 MHz,  $\text{CDCl}_3$ )  $\delta$  7.32-7.30 (d,  $J = 6.8\text{Hz}$ , 1H), 7.24-7.18 (m, 2H), 7.09-7.07 (d,  $J = 7.2\text{Hz}$ , 1H), 6.81 (s, 4H), 6.60-6.57 (dd,  $J = 10.0, 2.0\text{Hz}$ , 1H), 5.94-5.91 (dd,  $J = 10.0, 2.8\text{Hz}$ , 1H), 5.19-5.14 (t,  $J = 10.0\text{Hz}$ , 1H), 4.61-4.58 (d,  $J = 10.0\text{Hz}$ , 2H), 4.53 (s, 1H), 3.75 (s, 3H), 2.75 (s, 3H), 1.38 (s, 9H). The *ee* of **3af** was determined by HPLC analysis using Daicel Chiralcel OD-H column (25 cm  $\times$  0.46 cm ID), conditions: n-hexane/*i*-PrOH = 85/15, 1.0 mL/min, 254 nm;  $t_{\text{major}} = 17.0$  min,  $t_{\text{minor}} = 19.0$  min.

**2-(Ethylphenylamino)-1,2-dihydronaphthalen-1-yl-carbamic acid tert-butyl ester (3ak)**

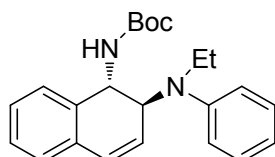

White solid, 96% yield, 94% *ee*.  $^1\text{H}$  NMR (400 MHz,  $\text{CDCl}_3$ )  $\delta$  7.31-7.30 (d,  $J = 6.4\text{Hz}$ , 1H), 7.24-7.20 (m, 4H), 7.11-7.09 (d,  $J = 6.4$ , 1H), 6.88-6.86 (d,  $J = 8.0\text{Hz}$ , 2H), 6.73-6.69 (t,  $J = 7.2\text{Hz}$ , 1H), 6.62-6.60 (d,  $J = 10.0\text{Hz}$ , 1H), 5.97-5.94 (t,  $J = 1.6\text{Hz}$ , 1H), 5.18-5.13 (t,  $J = 8.8\text{Hz}$ , 1H), 4.72-4.70 (d,  $J = 8.8\text{Hz}$ , 1H), 4.60 (s, 1H)

3.29-3.28 (d,  $J = 6.8\text{Hz}$ , 2H) 1.39 (s, 9H), 1.09-1.06 (t,  $J = 12.8\text{Hz}$ , 3H). The *ee* of **3aj** was determined by HPLC analysis using Daicel Chiralcel AD-H column (25 cm  $\times$  0.46 cm ID), conditions: n-hexane/*i*-PrOH = 95/5, 1mL/min, 254 nm;  $t_{\text{minor}} = 6.9$  min,  $t_{\text{major}} = 10.1$  min.

### 2-Dibenzylamino-1,2-dihydro-naphthalen-1-yl-carbamic acid *tert*-butyl ester (**3al**)

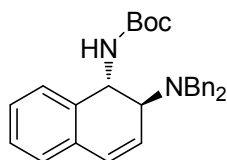

White solid, 90% yield, 93% *ee*.  $^1\text{H}$  NMR (400 MHz,  $\text{CDCl}_3$ )  $\delta$  7.38-7.37 (d,  $J = 7.2\text{Hz}$ , 4H), 7.29-7.25 (m, 4H), 7.22-7.19 (m, 4H), 7.05-7.03 (t,  $J = 4.8\text{Hz}$ , 1H), 6.61-6.58 (dd,  $J = 10.0, 1.6\text{Hz}$ , 1H), 6.07-6.04 (dd,  $J = 10.0, 3.6\text{Hz}$ , 1H), 5.27-5.23 (t,  $J = 8.4\text{Hz}$ , 1H), 4.50-4.48 (d,  $J = 8.8\text{Hz}$ , 1H), 3.76-3.73 (d,  $J = 13.6\text{Hz}$ , 1H), 3.56-3.53 (d,  $J = 13.6\text{Hz}$ , 1H), 3.47 (s, 1H), 1.53 (s, 9H). The *ee* of **3ak** was determined by HPLC analysis using Daicel Chiralcel AD-H column (25 cm  $\times$  0.46 cm ID), conditions: n-hexane/*i*-PrOH = 95/5, 1mL/min, 254 nm;  $t_{\text{minor}} = 7.7$  min,  $t_{\text{major}} = 10.7$  min.

### 2-(Naphthalen-1-yl-amino)-1,2-dihydro-naphthalen-1-yl-carbamic acid *tert*-butyl ester (**3ag**)

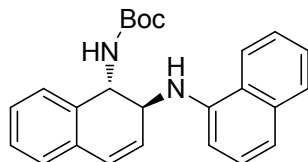

White solid, 80% yield, 93% *ee*.  $^1\text{H}$  NMR (400 MHz,  $\text{CDCl}_3$ )  $\delta$  7.79-7.75 (t,  $J = 16\text{Hz}$ , 2H), 7.44-7.34 (m, 4H), 7.31-7.21 (m, 3H), 7.17-7.15 (d,  $J = 7.2\text{Hz}$ , 1H), 6.75-6.73 (d,  $J = 7.6\text{Hz}$ , 1H), 6.59-6.57 (d,  $J = 9.6\text{Hz}$ , 1H), 6.20-6.17 (dd,  $J = 9.6, 3.2\text{Hz}$ , 1H), 5.34-5.29 (t,  $J = 9.6\text{Hz}$ , 1H), 5.00 (s, 1H), 4.86-4.84 (d,  $J = 9.6\text{Hz}$ , 1H), 4.45-4.43 (d,  $J = 8.8\text{Hz}$ , 1H), 1.44 (s, 9H). The *ee* of **3al** was determined by HPLC analysis using Daicel Chiralcel AD-H column (25 cm  $\times$  0.46 cm ID), conditions: n-hexane/*i*-PrOH = 90/10, 1 mL/min, 254 nm;  $t_{\text{minor}} = 6.4$  min,  $t_{\text{major}} = 10.5$  min.

### 2-(Naphthalen-1-yl-amino)-6,7-dibromo-1,2-dihydro-naphthalen-1-yl-carbamic acid *tert*-butyl ester (**3ga**)

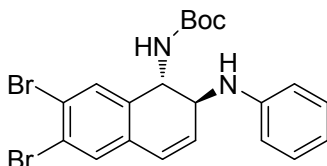

White solid, 93% yield, 94% *ee*.  $^1\text{H}$  NMR (400 MHz,  $\text{CDCl}_3$ )  $\delta$  7.57 (s, 1H), 7.38 (s, 1H), 7.22-7.18 (t,  $J = 8.0\text{Hz}$ , 2H), 6.75-6.71 (t,  $J = 7.2\text{Hz}$ , 1H), 6.69-6.67 (d,  $J = 7.6\text{Hz}$ , 1H), 6.48-6.46 (d,  $J = 9.6\text{Hz}$ , 1H), 6.18-6.15 (dd,  $J = 9.6, 4.0\text{Hz}$ , 1H), 5.02-4.98 (t,  $J = 8.4\text{Hz}$ , 1H), 4.71-4.69 (d,  $J = 9.2\text{Hz}$ , 1H), 4.25 (s, 1H), 3.83 (s, 1H), 1.46 (s, 9H).  $^{13}\text{C}$  NMR ( $\text{CDCl}_3$ , 100MHz):  $\delta$  155.88, 146.35, 134.94, 133.20, 132.71, 131.46, 130.63, 129.53, 126.76, 124.54, 123.79, 117.89, 113.13, 80.39, 53.45, 51.76, 28.35). HRMS ( $\text{EI}^+$ ): calcd for  $\text{C}_{21}\text{H}_{22}\text{Br}_2\text{N}_2\text{O}_2$  [ $\text{M}$ ] $^+$ : 492.0048; Found: 492.0074. The *ee* of **3ea** was determined by HPLC analysis using Daicel Chiralcel AD-H column (25 cm  $\times$  0.46 cm ID), conditions: n-hexane/*i*-PrOH = 95/5, 1 mL/min, 254 nm;  $t_{\text{minor}} = 10.6\text{min}$ ,  $t_{\text{major}} = 12.6\text{min}$ .

**2-(Naphthalen-1-yl-amino)-6,7-dimethyl-1,2-dihydro-naphthalen-1-yl-carbamic acid *tert*-butyl ester (3ea)**

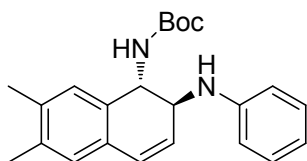

White solid, 93% yield, 93% *ee*.  $^1\text{H}$  NMR (400 MHz,  $\text{CDCl}_3$ )  $\delta$  7.20-7.17 (t,  $J = 15.6\text{Hz}$ , 2H), 7.07 (s, 1H), 6.92 (s, 1H), 6.74-6.68 (m, 3H), 6.53-6.51 (d,  $J = 9.6\text{Hz}$ , 1H), 6.04-6.00 (dd,  $J = 9.6, 4.4\text{Hz}$ , 1H), 4.98-4.95 (t,  $J = 8.0\text{Hz}$ , 1H), 4.68-4.66 (d,  $J = 8.8\text{Hz}$ , 1H), 4.25-4.22 (t,  $J = 4.8\text{Hz}$ , 1H), 3.82 (s, 1H), 2.24-2.23 (s, 6H), 1.46 (s, 9H).  $^{13}\text{C}$  NMR ( $\text{CDCl}_3$ , 100MHz):  $\delta$  155.86, 146.50, 136.85, 136.76, 131.17, 129.96, 129.67, 129.43, 128.66, 128.35, 126.90, 117.68, 113.44, 79.72, 53.45, 51.71, 28.44, 19.69, 19.48. HRMS ( $\text{EI}^+$ ): calcd for  $\text{C}_{23}\text{H}_{28}\text{N}_2\text{O}_2$  [ $\text{M}$ ] $^+$ : 364.2151, Found: 364.2159. The *ee* of **3fa** was determined by HPLC analysis using Daicel Chiralcel AD-H column (25 cm  $\times$  0.46 cm ID), conditions: n-hexane/*i*-PrOH = 98/2, 1 mL/min, 254 nm;  $t_{\text{minor}} = 31.8\text{min}$ ,  $t_{\text{major}} = 34.4\text{min}$ .

**2-(Naphthalen-1-yl-amino)-6,7-dimethoxy-1,2-dihydro-naphthalen-1-yl-carbamic acid *tert*-butyl ester (3fa)**



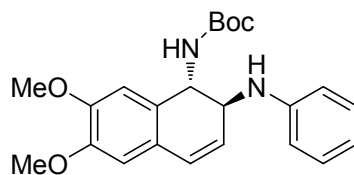

White solid, 94% yield, 93% *ee*.  $^1\text{H}$  NMR (400 MHz,  $\text{CDCl}_3$ )  $\delta$  7.21-7.19 (t,  $J = 17.2\text{Hz}$ , 2H), 6.83 (s, 1H), 6.77-6.75 (d,  $J = 8.0\text{Hz}$ , 2H), 6.72-6.68 (t,  $J = 7.2\text{Hz}$ , 1H), 6.66 (s, 1H), 6.51-6.48 (d,  $J = 9.6\text{Hz}$ , 1H), 6.00-5.96 (dd,  $J = 8.0, 4.0\text{Hz}$ , 1H), 4.95-4.93 (dd,  $J = 8.0, 4.0\text{Hz}$ , 1H), 4.75-4.73 (d,  $J = 8.8\text{Hz}$ , 1H), 4.24 (s, 1H), 3.98-3.97 (d,  $J = 2.4\text{Hz}$ , 1H), 3.87 (s, 1H), 3.83 (s, 3H), 1.46 (s, 9H).  $^{13}\text{C}$  NMR ( $\text{CDCl}_3$ , 100MHz):  $\delta$  155.72, 148.72, 148.70, 146.65, 129.45, 128.48, 126.29, 125.53, 124.94, 117.50, 113.22, 112.23, 110.15, 79.75, 56.06, 56.03, 52.48, 51.47, 28.42. HRMS ( $\text{EI}^+$ ): calcd for  $\text{C}_{23}\text{H}_{28}\text{N}_2\text{O}_4$   $[\text{M}]^+$ : 396.2049; Found: 396.2039. The *ee* of **3ga** was determined by HPLC analysis using Daicel Chiralcel AD-H column (25 cm  $\times$  0.46 cm ID), conditions: n-hexane/*i*-PrOH = 95/5, 1 mL/min, 254 nm;  $t_{\text{major}} = 26.9$  min,  $t_{\text{minor}} = 29.1$  min.

**2-(Naphthalen-1-yl-amino)-1,2-dihydro-naphthalen[2,3-*b*][1,4]dioxin-1-yl-carbamic acid *tert*-butyl ester (3ha)**

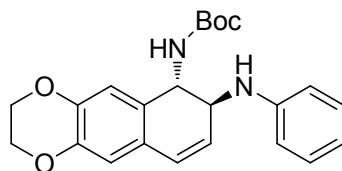

White solid, 95% yield, 94% *ee*.  $^1\text{H}$  NMR (400 MHz,  $\text{CDCl}_3$ )  $\delta$  7.21-7.17 (t,  $J = 8.0\text{Hz}$ , 2H), 6.84 (s, 1H), 6.75-6.69 (m, 3H), 6.67 (s, 1H), 6.45-6.43 (d,  $J = 9.2\text{Hz}$ , 1H), 6.00-5.96 (dd,  $J = 9.6, 4.4\text{Hz}$ , 1H), 4.93-4.89 (t,  $J = 8.4\text{Hz}$ , 1H), 4.69-4.67 (d,  $J = 8.8\text{Hz}$ , 1H), 4.35-4.33 (t,  $J = 2.8\text{Hz}$ , 1H), 4.24 (s, 5H), 1.45 (s, 9H).  $^{13}\text{C}$  NMR ( $\text{CDCl}_3$ , 100MHz):  $\delta$  155.74, 143.23, 129.38, 129.28, 128.24, 127.23, 126.03, 125.92, 118.30, 117.28, 115.83, 114.03, 113.35, 79.77, 64.40, 64.35, 53.83, 51.56, 28.35. HRMS ( $\text{EI}^+$ ): calcd for  $\text{C}_{23}\text{H}_{26}\text{N}_2\text{O}_4$   $[\text{M}]^+$ : 394.1893; Found: 394.1909. The *ee* of **3fa** was determined by HPLC analysis using Daicel Chiralcel AD-H column (25 cm  $\times$  0.46 cm ID), conditions: n-hexane/*i*-PrOH = 85/15, 1 mL/min, 254 nm;  $t_{\text{minor}} = 11.3$  min,  $t_{\text{major}} = 14.3$  min.

**2-(Naphthalen-1-yl-amino)-1,2-dihydro-naphthalen[2,3-*d*][1,3]dioxol-1-yl-carbamic acid *tert*-butyl ester (3ia)**

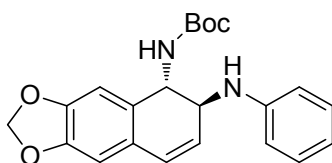

White solid, 95% yield, 94% *ee*.  $^1\text{H}$  NMR (400 MHz,  $\text{CDCl}_3$ )  $\delta$  7.21-7.17 (t,  $J = 8.0\text{Hz}$ , 2H), 6.82 (s, 1H), 6.74-6.68 (m, 3H), 6.63 (s, 1H), 6.46-6.44 (d,  $J = 9.6\text{Hz}$ , 1H), 6.01-5.97 (dd,  $J = 9.6, 4.8\text{Hz}$ , 1H), 5.94-5.93 (d,  $J = 3.2\text{Hz}$ , 1H), 4.93-4.90 (m, 1H), 4.70-4.68 (d,  $J = 8.8\text{Hz}$ , 1H), 4.21 (s, 1H), 3.74 (s, 1H), 1.45 (s, 9H),  $^{13}\text{C}$  NMR ( $\text{CDCl}_3$ , 100MHz):  $\delta$  155.71, 143.53, 147.29, 146.56, 129.45, 128.53, 127.98, 126.46, 125.91, 117.68, 113.32, 109.44, 107.49, 101.23, 79.83, 52.91, 52.03, 28.41. HRMS ( $\text{EI}^+$ ): calcd for  $\text{C}_{22}\text{H}_{24}\text{N}_2\text{O}_4$   $[\text{M}]^+$ : 380.1736, Found: 380.1748. The *ee* of **3fa** was determined by HPLC analysis using Daicel Chiralcel AD-H column (25 cm  $\times$  0.46 cm ID), conditions: n-hexane/*i*-PrOH = 90/10, 1 mL/min, 254 nm;  $t_{\text{minor}} = 12.1$  min,  $t_{\text{major}} = 14.7$  min.

***N*-[2-(Phenylamino)-1,2-dihydro-naphthalen-1-yl]-4-methyl-benzenesulfonamide (3ba)**

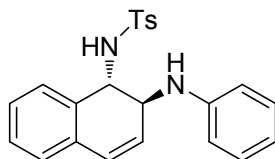

White solid, 90% yield, 88% *ee*.  $^1\text{H}$  NMR (400 MHz,  $\text{CDCl}_3$ )  $\delta$  7.76-7.74 (d,  $J = 8.0\text{Hz}$ , 2H), 7.32-7.30 (d,  $J = 8.0\text{Hz}$ , 1H), 7.24 (d,  $J = 1.2\text{Hz}$ , 1H), 7.18-7.11 (m, 3H), 7.04-7.00 (dt,  $J = 7.6, 0.8\text{Hz}$ , 1H), 6.74-6.71 (t,  $J = 14.4\text{Hz}$ , 1H), 6.62-6.54 (m, 4H), 6.10-6.06 (dd,  $J = 9.6, 5.6\text{Hz}$ , 1H), 4.80-4.78 (d,  $J = 8.0\text{Hz}$ , 1H), 4.45-4.43 (dd,  $J = 7.6, 3.2\text{Hz}$ , 1H), 4.36 (s, 1H), 3.47 (s, 1H), 2.46 (s, 3H). The *ee* of **3ba** was determined by HPLC analysis using Daicel Chiralcel AD-H column (25 cm  $\times$  0.46 cm ID), conditions: n-hexane/*i*-PrOH = 70/30, 1 mL/min, 254 nm;  $t_{\text{minor}} = 8.4$  min,  $t_{\text{major}} = 10.2$  min.

**4-nitro-*N*-[2-(Phenylamino)-1,2-dihydro-naphthalen-1-yl]-4-methyl-benzenesulfonamide (3ca)**

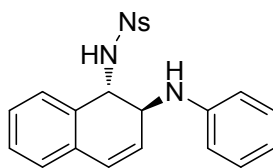

White solid, 86% yield, 84% *ee*.  $^1\text{H}$  NMR (400 MHz,  $\text{CDCl}_3$ )  $\delta$  8.29-8.27 (d,  $J = 8.4\text{Hz}$ , 2H), 7.98-7.96(d,  $J = 8.4\text{Hz}$ , 2H), 7.28-7.24 (t,  $J = 6.8\text{Hz}$ , 2H), 7.19-7.13(m, 3H), 7.05-7.01 (t,  $J = 7.6\text{Hz}$ , 1H), 6.77-6.73(t,  $J = 7.2\text{Hz}$ , 1H), 6.64-6.59 (dd,  $J = 14.0$ , 6.4Hz, 4H), 6.10=6.06 (dd,  $J = 9.2$ , 5.2Hz, 1H), 5.12-5.10 (d,  $J = 8.0\text{Hz}$ , 1H), 4.58-4.55 (dd,  $J = 8.0$ , 3.2Hz, 1H), 4.36 (s, 1H), 3.47 (s, 1H).  $^{13}\text{C}$  NMR ( $\text{CDCl}_3$ , 100MHz):  $\delta$  149.84, 146.37, 145.52, 131.66, 131.32, 129.51, 129.46, 129.35, 128.88, 128.49, 128.33, 127.49, 126.38, 124.29, 118.22, 113.23, 54.13, 52.39. HRMS ( $\text{EI}^+$ ): calcd for  $\text{C}_{22}\text{H}_{19}\text{N}_3\text{O}_4\text{S}$  [ $\text{M}]^+$ : 421.1096, Found: 421.1103. The *ee* of **3fa** was determined by HPLC analysis using Daicel Chiralcel AD-H column (25 cm  $\times$  0.46 cm ID), conditions: n-hexane/*i*-PrOH = 60/40, 1 mL/min, 254 nm;  $t_{\text{minor}} = 12.8$  min,  $t_{\text{major}} = 17.7\text{min}$ .

### 2-(Phenylamino)-1,2-dihydronaphthalen-1-yl-carbamic acid methyl ester (3da)

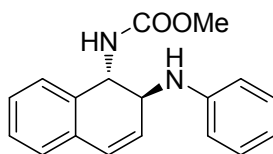

White solid, 88% yield, 83% *ee*.  $^1\text{H}$  NMR (400 MHz,  $\text{CDCl}_3$ )  $\delta$  7.30-7.28 (d,  $J = 7.2\text{Hz}$ , 2H), 7.22-7.13(m, 4H), 6.76-6.69(m, 3H), 6.59-6.56(d,  $J = 9.6$ , 1H), 6.08-6.04 (dd,  $J = 9.6$ , 5.2Hz, 1H), 5.05-5.02(t,  $J = 5.6\text{Hz}$ , 1H), 4.96-4.94(d,  $J = 8.4\text{Hz}$ , 1H), 4.32-4.30 (t,  $J = 4.8$ , 1H), 3.79 (s, 1H), 3.65(s, 1H).  $^{13}\text{C}$  NMR ( $\text{CDCl}_3$ , 100MHz):  $\delta$  156.88, 146.35, 133.27, 132.13, 129.40, 129.34, 128.85, 128.73, 128.39, 127.50, 127.04, 117.75, 113.34, 52.50, 52.27. HRMS ( $\text{EI}^+$ ): calcd for  $\text{C}_{18}\text{H}_{18}\text{N}_2\text{O}_2$  [ $\text{M}]^+$ : 294.1368, Found: 294.1367. The *ee* of **3fa** was determined by HPLC analysis using Daicel Chiralcel AD-H column (25 cm  $\times$  0.46 cm ID), conditions: n-hexane/*i*-PrOH = 90/10, 1 mL/min, 254 nm;  $t_{\text{minor}} = 8.7\text{min}$ ,  $t_{\text{major}} = 13.1\text{min}$ .

## D. HPLC Spectra

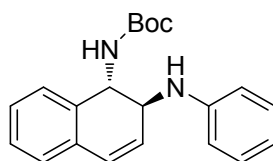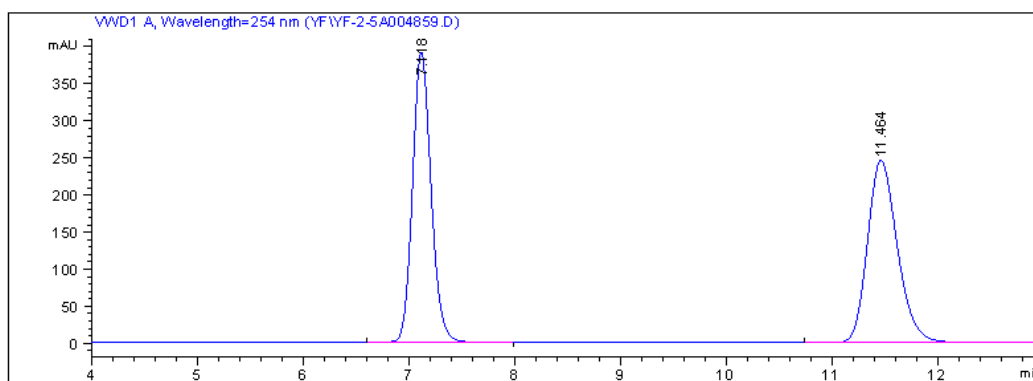

| Peak # | RetTime [min] | Type | Width [min] | Area [mAU*s] | Height [mAU] | Area %  |
|--------|---------------|------|-------------|--------------|--------------|---------|
| 1      | 7.118         | BB   | 0.1888      | 4795.83789   | 391.80380    | 49.7952 |
| 2      | 11.464        | BBA  | 0.3033      | 4835.27930   | 246.00044    | 50.2048 |

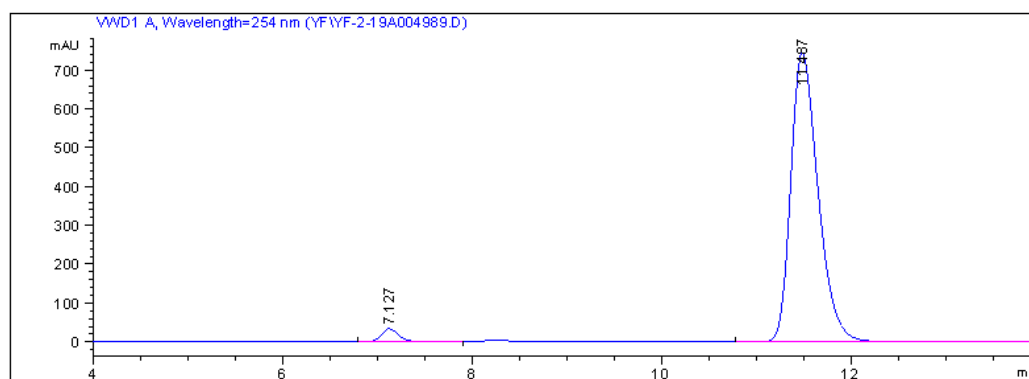

| Peak # | RetTime [min] | Type | Width [min] | Area [mAU*s] | Height [mAU] | Area %  |
|--------|---------------|------|-------------|--------------|--------------|---------|
| 1      | 7.127         | BB   | 0.1939      | 419.46729    | 33.30483     | 2.7346  |
| 2      | 11.487        | BBA  | 0.3065      | 1.49200e4    | 745.52228    | 97.2654 |

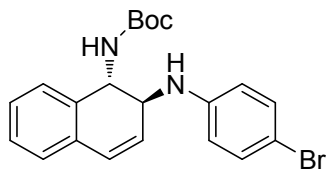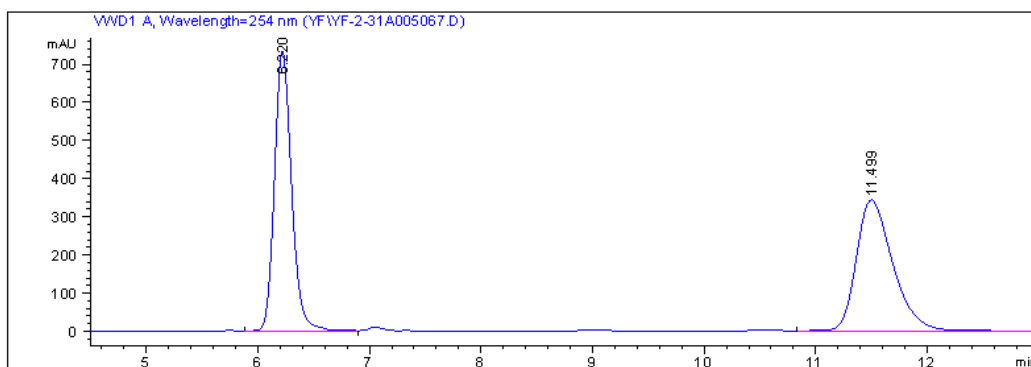

| Peak # | RetTime [min] | Type | Width [min] | Area [mAU*s] | Height [mAU] | Area %  |
|--------|---------------|------|-------------|--------------|--------------|---------|
| 1      | 6.220         | VV   | 0.1647      | 7854.50732   | 734.91833    | 49.7783 |
| 2      | 11.499        | VB   | 0.3483      | 7924.46631   | 344.57745    | 50.2217 |

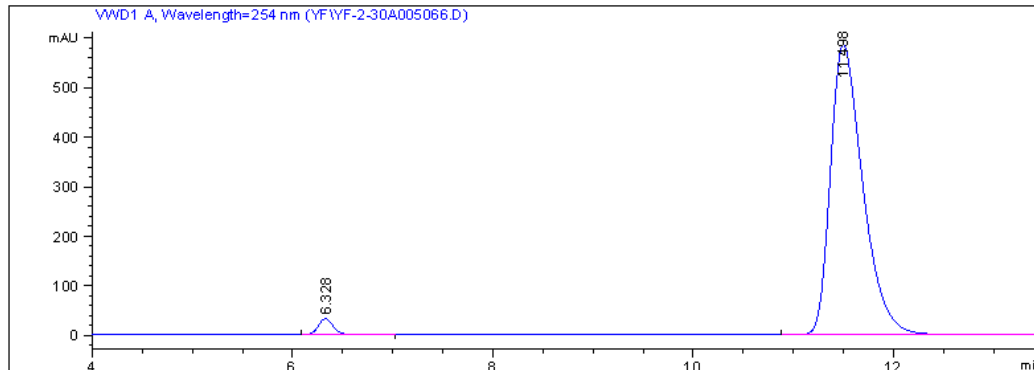

| Peak # | RetTime [min] | Type | Width [min] | Area [mAU*s] | Height [mAU] | Area %  |
|--------|---------------|------|-------------|--------------|--------------|---------|
| 1      | 6.328         | BB   | 0.1607      | 339.55743    | 32.28323     | 2.5069  |
| 2      | 11.498        | BBA  | 0.3448      | 1.32054e4    | 586.16656    | 97.4931 |

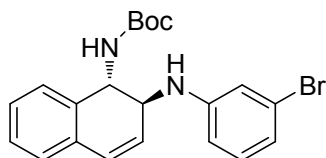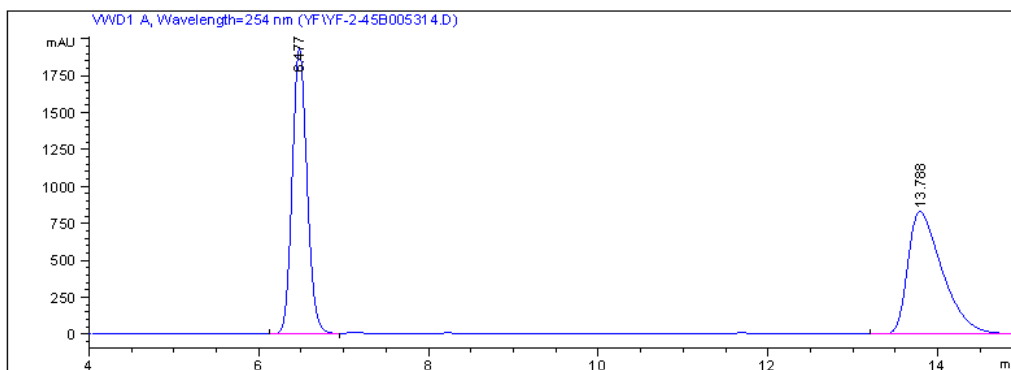

| Peak # | RetTime [min] | Tvpe | Width [min] | Area [mAU*s] | Height [mAU] | Area %  |
|--------|---------------|------|-------------|--------------|--------------|---------|
| 1      | 6.477         | BV   | 0.1889      | 2.34417e4    | 1927.71423   | 49.8774 |
| 2      | 13.788        | BBA  | 0.4276      | 2.35569e4    | 831.43274    | 50.1226 |

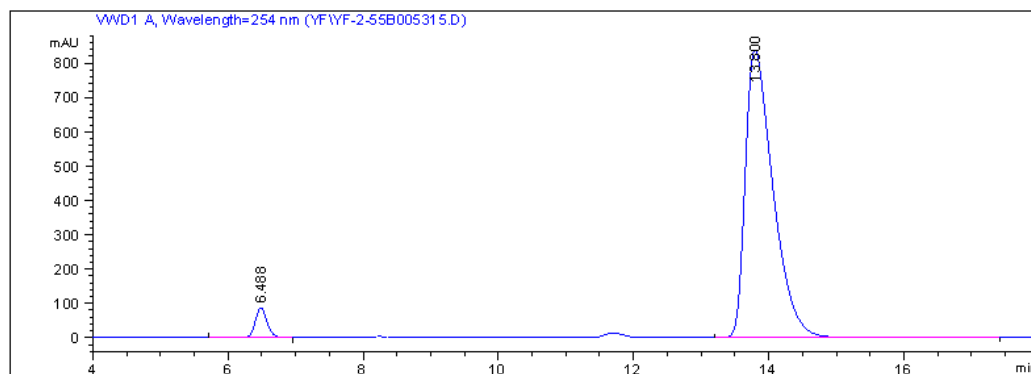

| Peak # | RetTime [min] | Type | Width [min] | Area [mAU*s] | Height [mAU] | Area %  |
|--------|---------------|------|-------------|--------------|--------------|---------|
| 1      | 6.488         | BV   | 0.1878      | 1067.16528   | 87.81960     | 4.2769  |
| 2      | 13.800        | BB   | 0.4290      | 2.38844e4    | 839.23438    | 95.7231 |

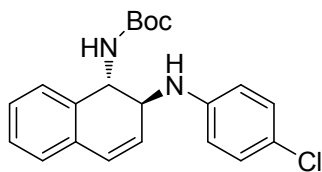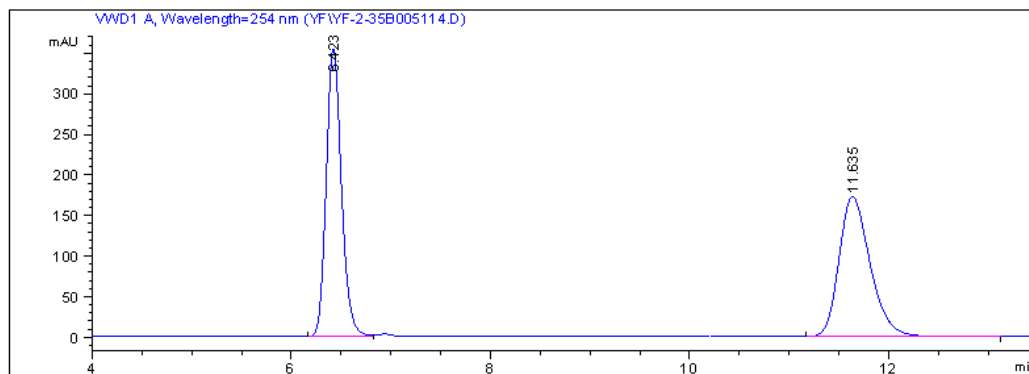

| Peak # | RetTime [min] | Type | Width [min] | Area [mAU*s] | Height [mAU] | Area %  |
|--------|---------------|------|-------------|--------------|--------------|---------|
| 1      | 6.423         | BV   | 0.1661      | 3770.54053   | 354.52911    | 50.3218 |
| 2      | 11.635        | BB   | 0.3320      | 3722.31470   | 172.30028    | 49.6782 |

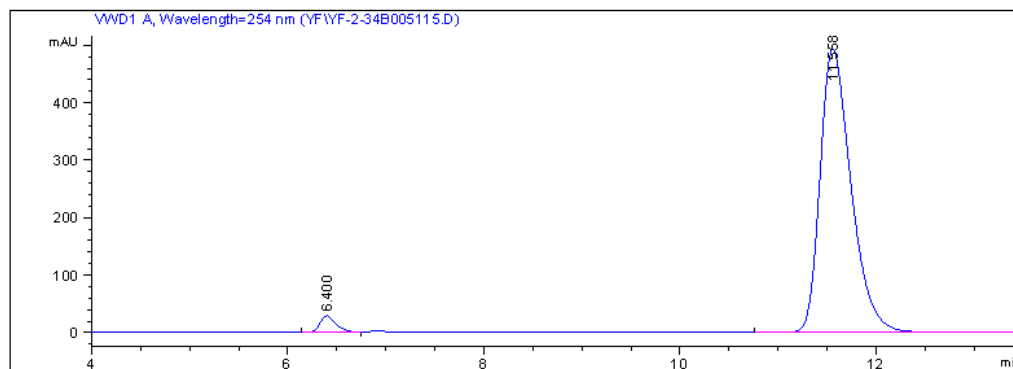

| Peak # | RetTime [min] | Type | Width [min] | Area [mAU*s] | Height [mAU] | Area %  |
|--------|---------------|------|-------------|--------------|--------------|---------|
| 1      | 6.400         | BV   | 0.1759      | 341.29016    | 29.28971     | 3.0422  |
| 2      | 11.558        | BBA  | 0.3389      | 1.08773e4    | 493.98364    | 96.9578 |

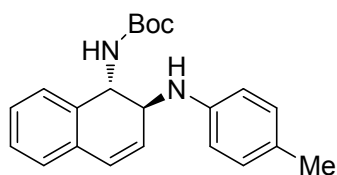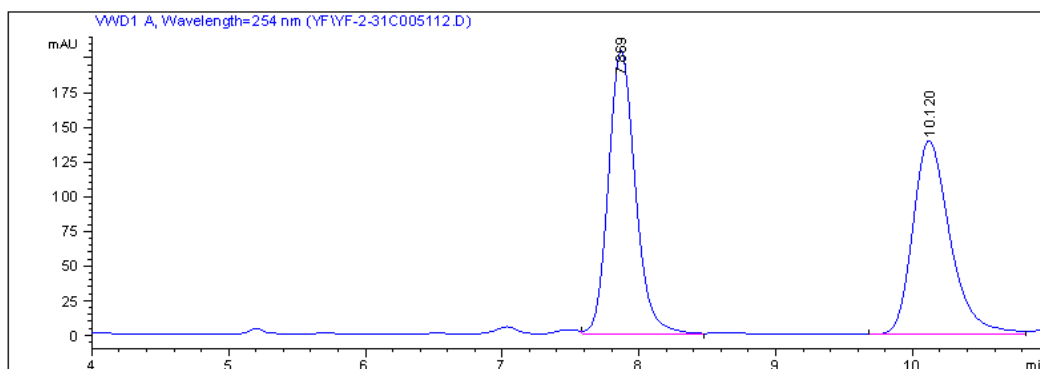

| Peak # | RetTime [min] | Type | Width [min] | Area [mAU*s] | Height [mAU] | Area %  |
|--------|---------------|------|-------------|--------------|--------------|---------|
| 1      | 7.869         | VB   | 0.2089      | 2776.30347   | 203.88681    | 51.2753 |
| 2      | 10.120        | BV   | 0.2887      | 2638.20459   | 139.46426    | 48.7247 |

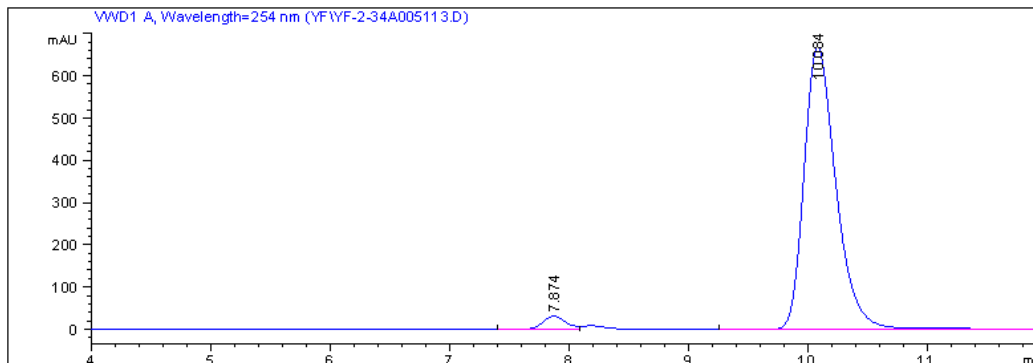

| Peak # | RetTime [min] | Type | Width [min] | Area [mAU*s] | Height [mAU] | Area %  |
|--------|---------------|------|-------------|--------------|--------------|---------|
| 1      | 7.874         | BV   | 0.2063      | 420.42468    | 30.98948     | 3.2688  |
| 2      | 10.084        | BBA  | 0.2850      | 1.24412e4    | 669.03516    | 96.7312 |



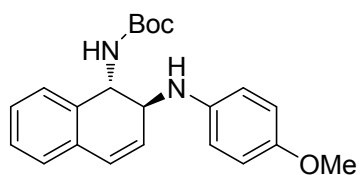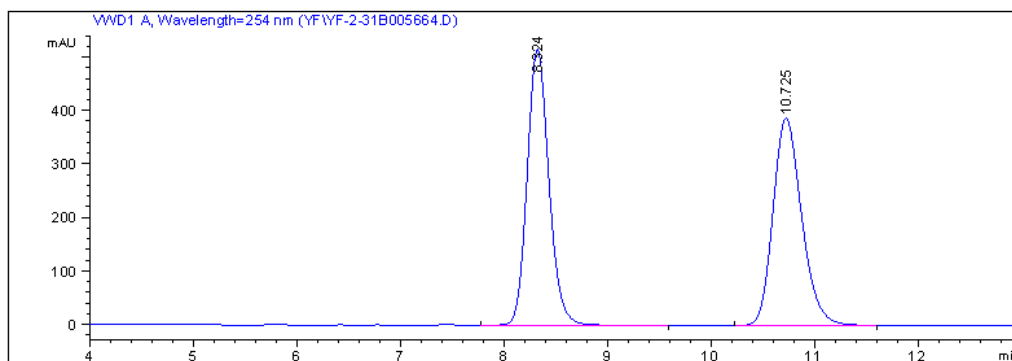

| Peak # | RetTime [min] | Type | Width [min] | Area [mAU*s] | Height [mAU] | Area %  |
|--------|---------------|------|-------------|--------------|--------------|---------|
| 1      | 8.324         | BB   | 0.2254      | 7540.50293   | 516.28625    | 50.3038 |
| 2      | 10.725        | BB   | 0.2963      | 7449.41846   | 387.38812    | 49.6962 |

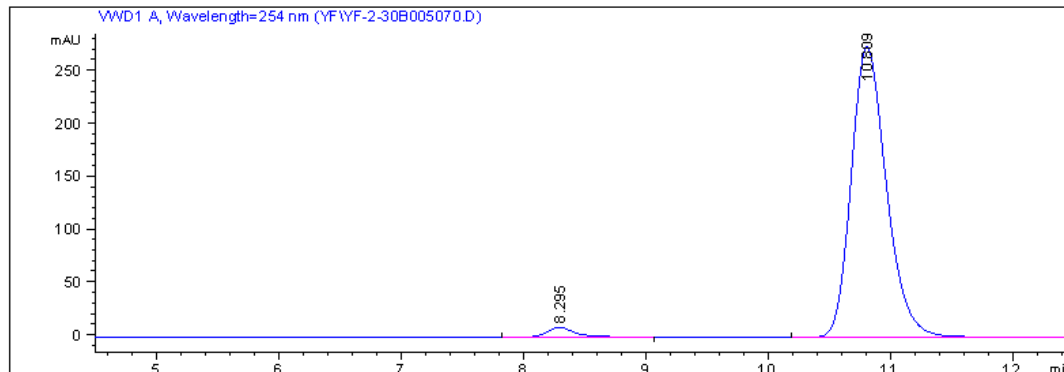

| Peak # | RetTime [min] | Type | Width [min] | Area [mAU*s] | Height [mAU] | Area %  |
|--------|---------------|------|-------------|--------------|--------------|---------|
| 1      | 8.295         | BB   | 0.2512      | 156.64738    | 9.31397      | 2.7733  |
| 2      | 10.809        | BB   | 0.3074      | 5491.80029   | 274.45465    | 97.2267 |

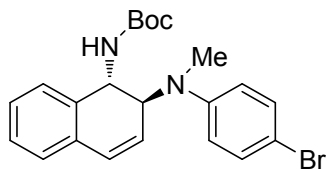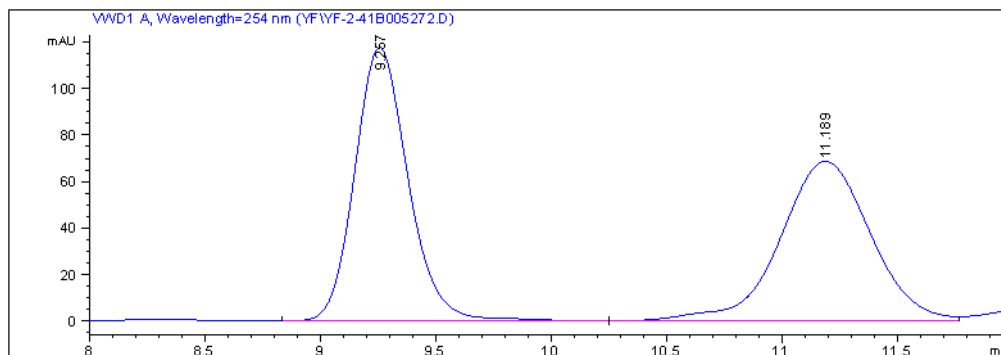

| Peak # | RetTime [min] | Type | Width [min] | Area [mAU*s] | Height [mAU] | Area %  |
|--------|---------------|------|-------------|--------------|--------------|---------|
| 1      | 9.257         | BB   | 0.2468      | 1883.45215   | 117.64974    | 50.2377 |
| 2      | 11.189        | BV   | 0.4205      | 1865.63000   | 68.56197     | 49.7623 |

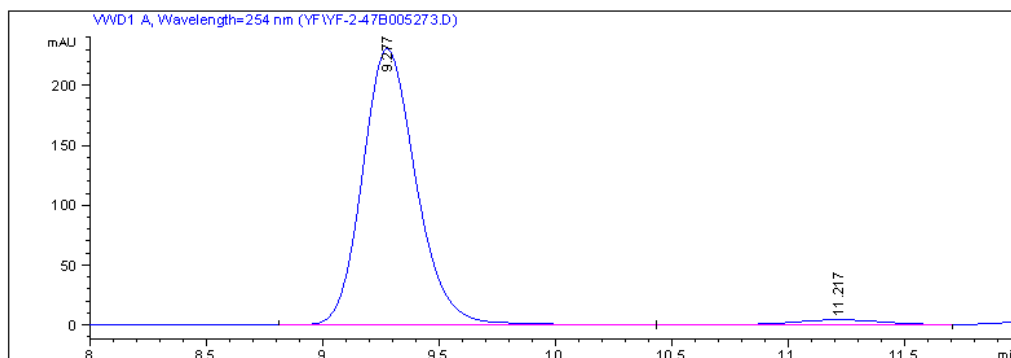

| Peak # | RetTime [min] | Type | Width [min] | Area [mAU*s] | Height [mAU] | Area %  |
|--------|---------------|------|-------------|--------------|--------------|---------|
| 1      | 9.277         | BB   | 0.2454      | 3682.23413   | 230.45601    | 97.0462 |
| 2      | 11.217        | BV   | 0.4157      | 112.07603    | 4.20805      | 2.9538  |

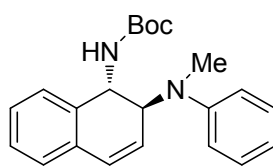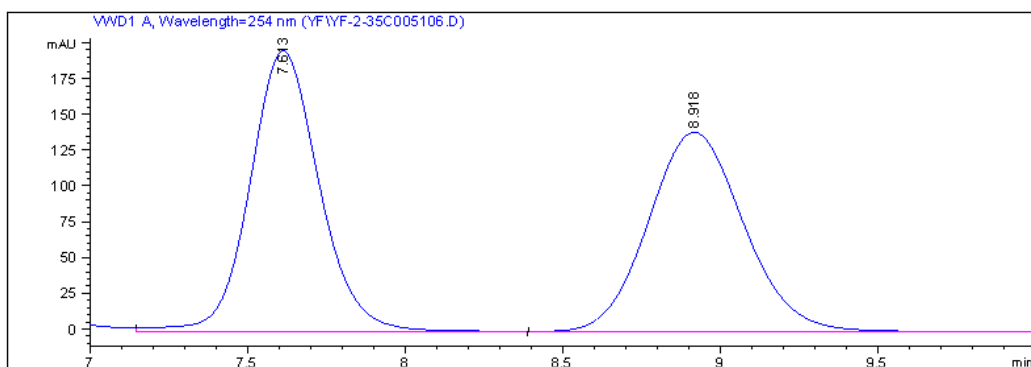

| Peak # | RetTime [min] | Type | Width [min] | Area [mAU*s] | Height [mAU] | Area %  |
|--------|---------------|------|-------------|--------------|--------------|---------|
| 1      | 7.613         | VB   | 0.2342      | 2994.43335   | 196.09740    | 50.5089 |
| 2      | 8.918         | BB   | 0.3266      | 2934.09644   | 139.37543    | 49.4911 |

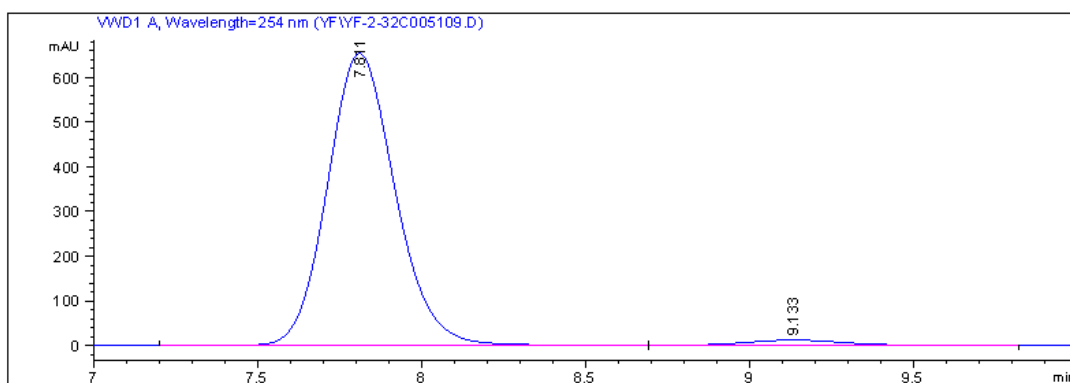

| Peak # | RetTime [min] | Type | Width [min] | Area [mAU*s] | Height [mAU] | Area %  |
|--------|---------------|------|-------------|--------------|--------------|---------|
| 1      | 7.811         | BB   | 0.2223      | 9376.73242   | 653.78461    | 97.5175 |
| 2      | 9.133         | BB   | 0.3137      | 238.70103    | 11.86453     | 2.4825  |

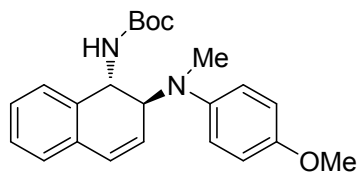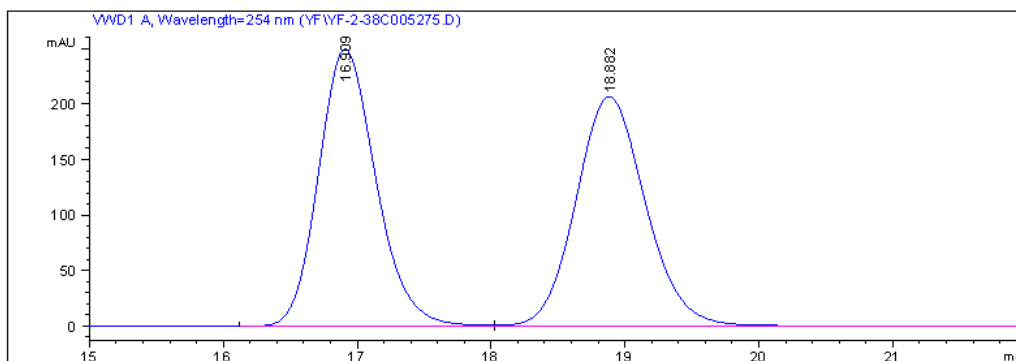

| Peak # | RetTime [min] | Type | Width [min] | Area [mAU*s] | Height [mAU] | Area %  |
|--------|---------------|------|-------------|--------------|--------------|---------|
| 1      | 16.909        | BV   | 0.4599      | 7445.46924   | 249.66118    | 49.8226 |
| 2      | 18.882        | VBA  | 0.5587      | 7498.50488   | 206.95987    | 50.1774 |

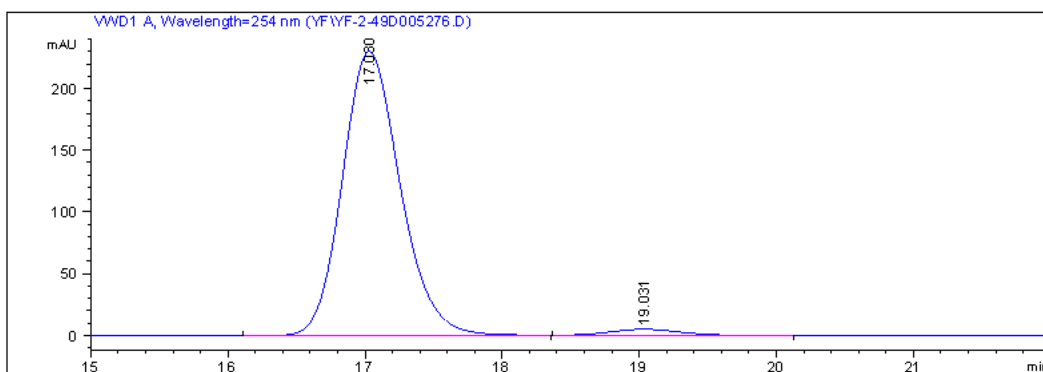

| Peak # | RetTime [min] | Type | Width [min] | Area [mAU*s] | Height [mAU] | Area %  |
|--------|---------------|------|-------------|--------------|--------------|---------|
| 1      | 17.030        | BB   | 0.4496      | 6736.91260   | 230.08426    | 97.5035 |
| 2      | 19.031        | BB   | 0.5620      | 172.49542    | 4.86123      | 2.4965  |

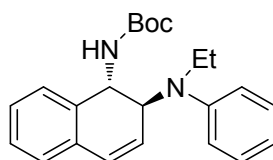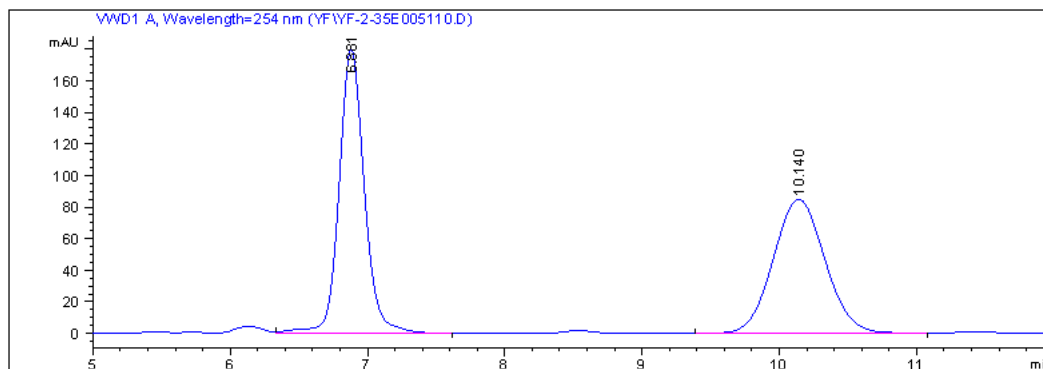

| Peak # | RetTime [min] | Type | Width [min] | Area [mAU*s] | Height [mAU] | Area %  |
|--------|---------------|------|-------------|--------------|--------------|---------|
| 1      | 6.881         | VB   | 0.1973      | 2300.47705   | 179.81374    | 50.9302 |
| 2      | 10.140        | BB   | 0.4088      | 2216.43994   | 84.84193     | 49.0698 |

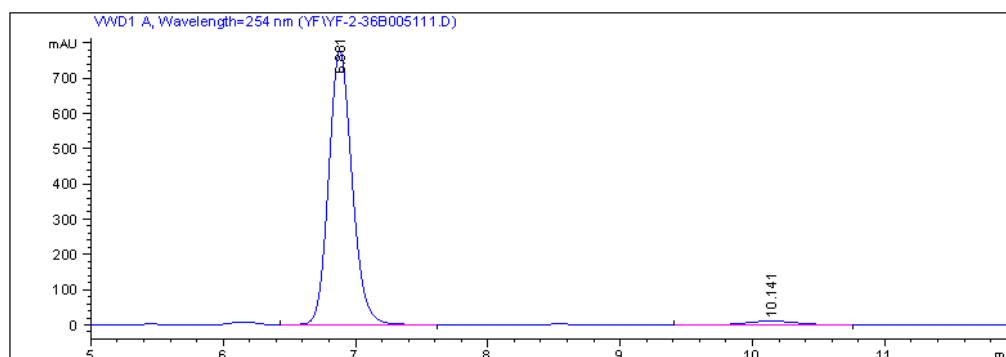

| Peak # | RetTime [min] | Type | Width [min] | Area [mAU*s] | Height [mAU] | Area %  |
|--------|---------------|------|-------------|--------------|--------------|---------|
| 1      | 6.881         | VB   | 0.1898      | 9587.42383   | 777.81891    | 97.1087 |
| 2      | 10.141        | BB   | 0.3999      | 285.45468    | 11.10435     | 2.8913  |

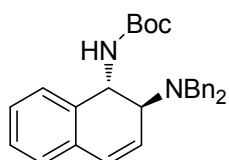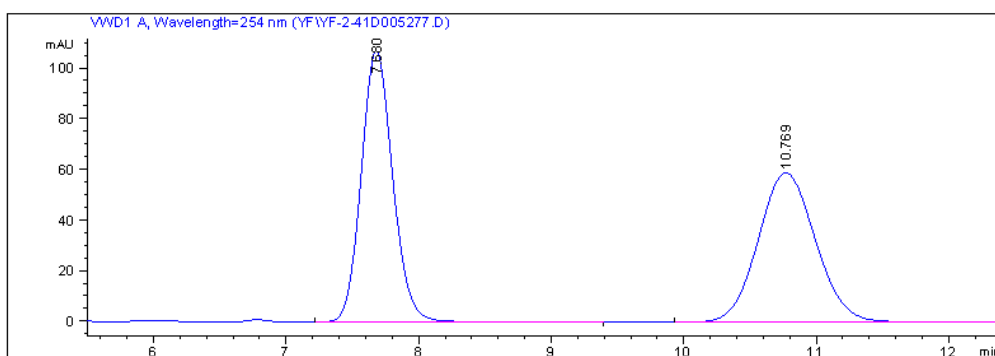

| Peak # | RetTime [min] | Type | Width [min] | Area [mAU*s] | Height [mAU] | Area %  |
|--------|---------------|------|-------------|--------------|--------------|---------|
| 1      | 7.680         | BB   | 0.2553      | 1764.58057   | 107.06245    | 49.9669 |
| 2      | 10.769        | BB   | 0.4662      | 1766.91980   | 59.04038     | 50.0331 |

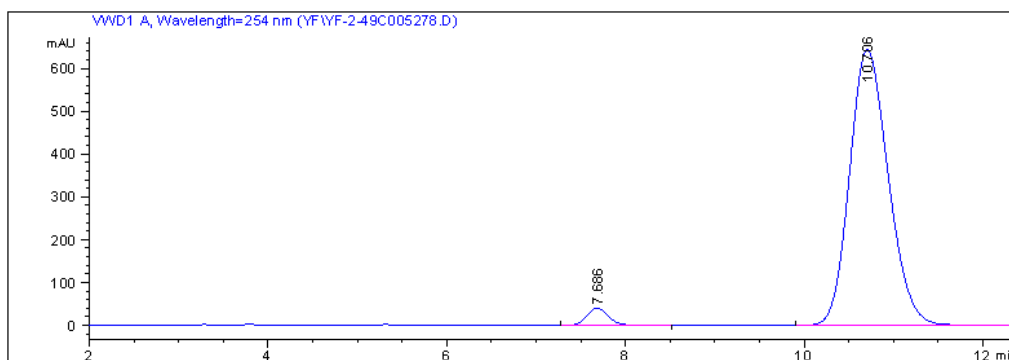

| Peak # | RetTime [min] | Type | Width [min] | Area [mAU*s] | Height [mAU] | Area %  |
|--------|---------------|------|-------------|--------------|--------------|---------|
| 1      | 7.686         | BB   | 0.2593      | 666.73627    | 40.02446     | 3.3348  |
| 2      | 10.706        | BBA  | 0.4663      | 1.93263e4    | 643.59265    | 96.6652 |

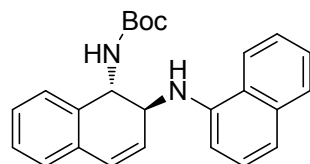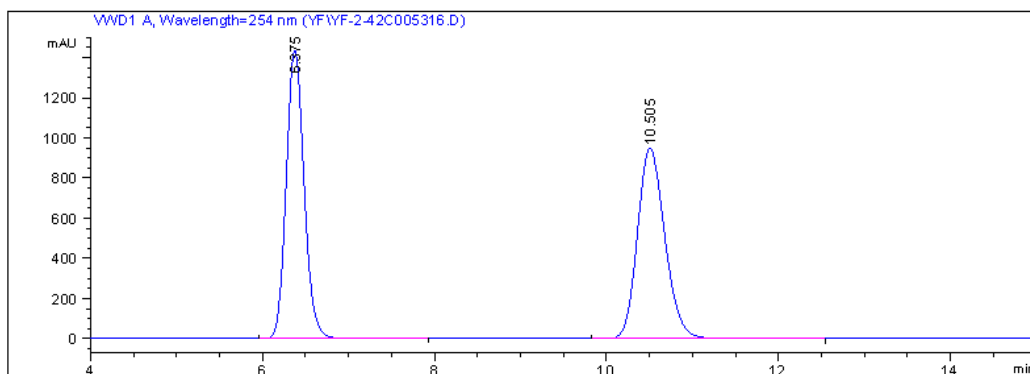

| Peak # | RetTime [min] | Type | Width [min] | Area [mAU*s] | Height [mAU] | Area %  |
|--------|---------------|------|-------------|--------------|--------------|---------|
| 1      | 6.375         | BB   | 0.2237      | 2.07629e4    | 1436.11926   | 49.8100 |
| 2      | 10.505        | BB   | 0.3428      | 2.09213e4    | 946.82690    | 50.1900 |

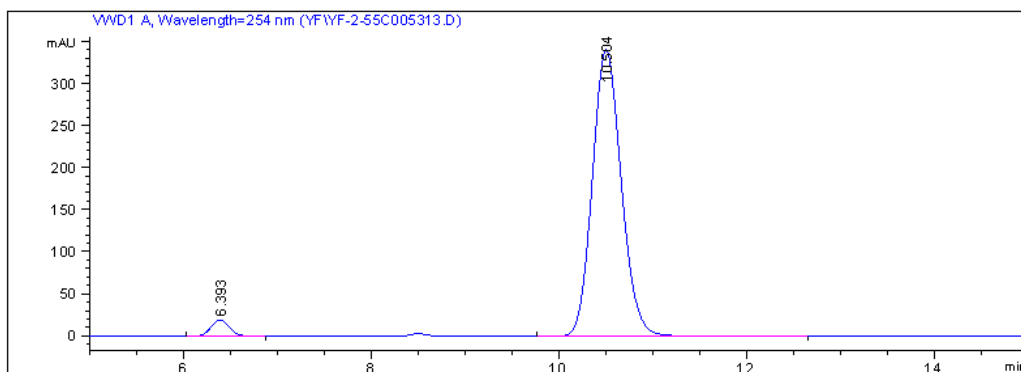

| Peak # | RetTime [min] | Type | Width [min] | Area [mAU*s] | Height [mAU] | Area %  |
|--------|---------------|------|-------------|--------------|--------------|---------|
| 1      | 6.393         | BB   | 0.2177      | 267.24817    | 19.28623     | 3.5220  |
| 2      | 10.504        | BB   | 0.3330      | 7320.75684   | 340.32135    | 96.4780 |

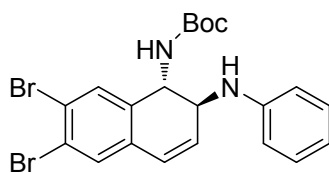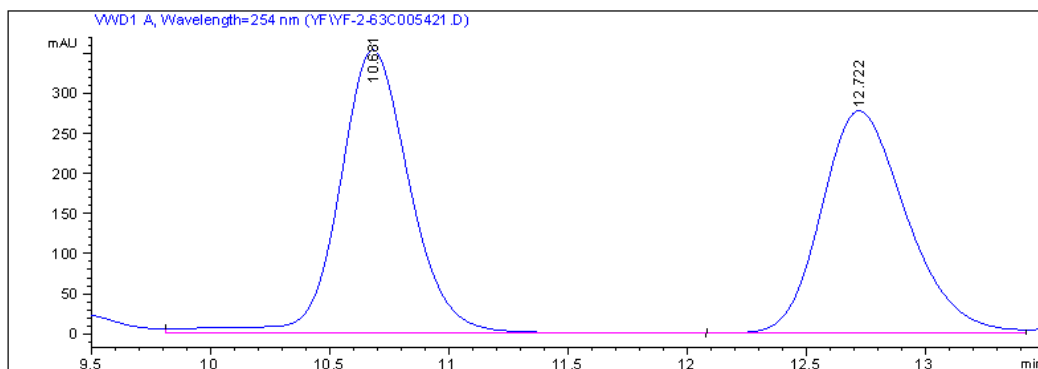

| Peak # | RetTime [min] | Type | Width [min] | Area [mAU*s] | Height [mAU] | Area %  |
|--------|---------------|------|-------------|--------------|--------------|---------|
| 1      | 10.681        | VB   | 0.3132      | 7240.88379   | 353.17575    | 51.3230 |
| 2      | 12.722        | BV   | 0.3811      | 6867.57715   | 277.16641    | 48.6770 |

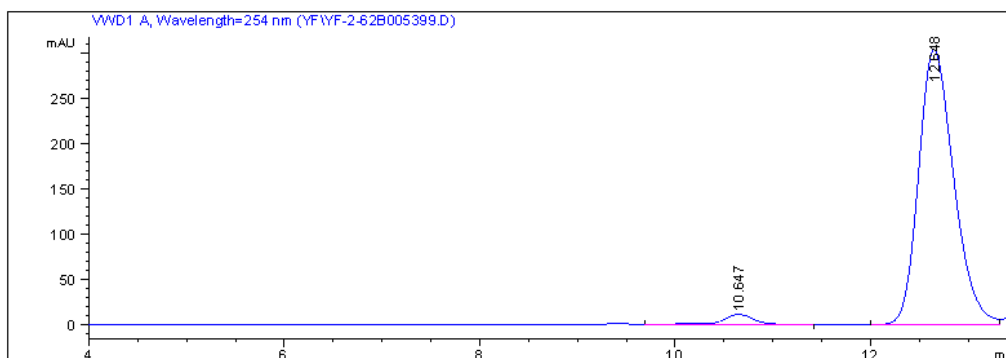

| Peak # | RetTime [min] | Type | Width [min] | Area [mAU*s] | Height [mAU] | Area %  |
|--------|---------------|------|-------------|--------------|--------------|---------|
| 1      | 10.647        | BB   | 0.3201      | 234.78267    | 11.17488     | 3.0072  |
| 2      | 12.648        | BV   | 0.3837      | 7572.55127   | 303.94971    | 96.9928 |



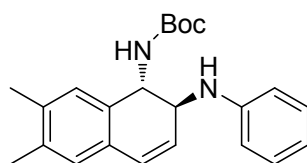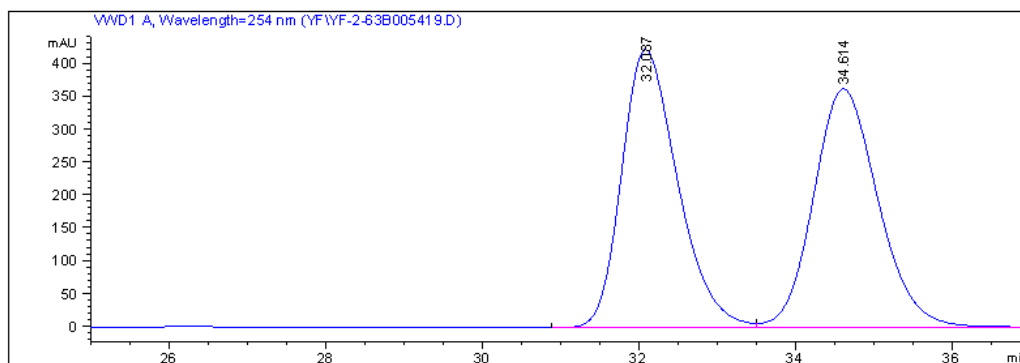

| Peak # | RetTime [min] | Type | Width [min] | Area [mAU*s] | Height [mAU] | Area %  |
|--------|---------------|------|-------------|--------------|--------------|---------|
| 1      | 32.087        | BV   | 0.7610      | 2.09800e4    | 422.72424    | 50.3079 |
| 2      | 34.614        | VBA  | 0.8825      | 2.07232e4    | 362.74377    | 49.6921 |

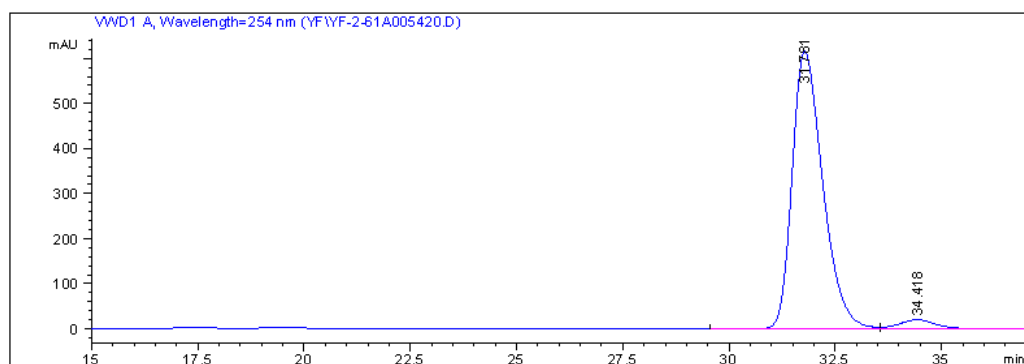

| Peak # | RetTime [min] | Type | Width [min] | Area [mAU*s] | Height [mAU] | Area %  |
|--------|---------------|------|-------------|--------------|--------------|---------|
| 1      | 31.781        | BV   | 0.7693      | 3.08527e4    | 616.03589    | 96.3048 |
| 2      | 34.418        | VB   | 0.9000      | 1183.80273   | 20.07495     | 3.6952  |

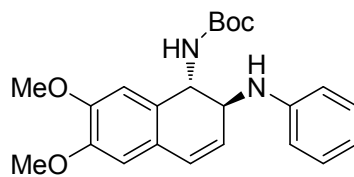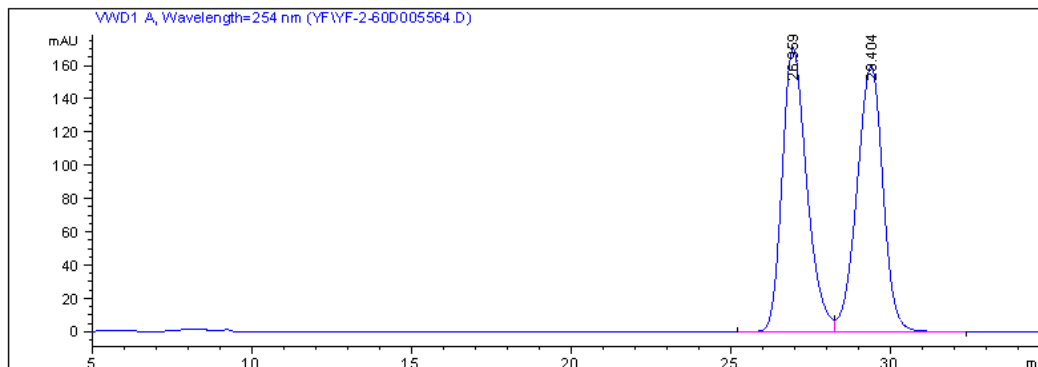

| Peak # | RetTime [min] | Type | Width [min] | Area [mAU*s] | Height [mAU] | Area %  |
|--------|---------------|------|-------------|--------------|--------------|---------|
| 1      | 26.959        | BV   | 0.8206      | 9176.57520   | 170.86055    | 50.3042 |
| 2      | 29.404        | VB   | 0.8804      | 9065.57813   | 159.67296    | 49.6958 |

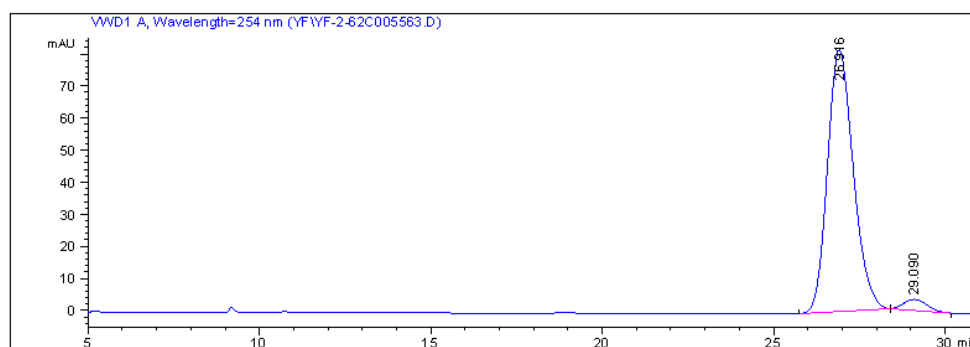

| Peak # | RetTime [min] | Type | Width [min] | Area [mAU*s] | Height [mAU] | Area %  |
|--------|---------------|------|-------------|--------------|--------------|---------|
| 1      | 26.916        | BB   | 0.8127      | 4279.49756   | 81.61860     | 96.3328 |
| 2      | 29.090        | BB   | 0.7043      | 162.91208    | 3.44143      | 3.6672  |

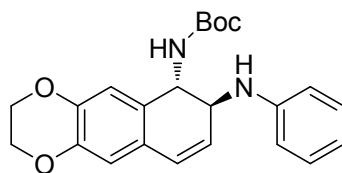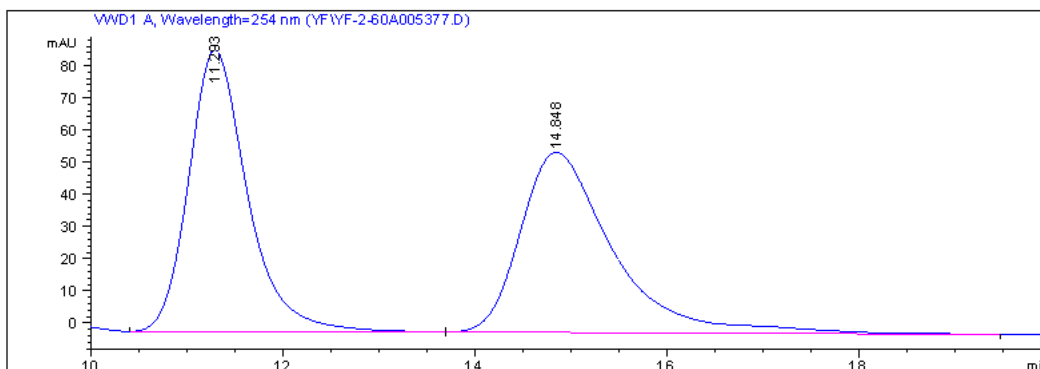

| Peak # | RetTime [min] | Type | Width [min] | Area [mAU*s] | Height [mAU] | Area %  |
|--------|---------------|------|-------------|--------------|--------------|---------|
| 1      | 11.293        | BB   | 0.6401      | 3714.93018   | 87.53896     | 49.8053 |
| 2      | 14.848        | BB   | 0.9935      | 3743.97510   | 55.89447     | 50.1947 |

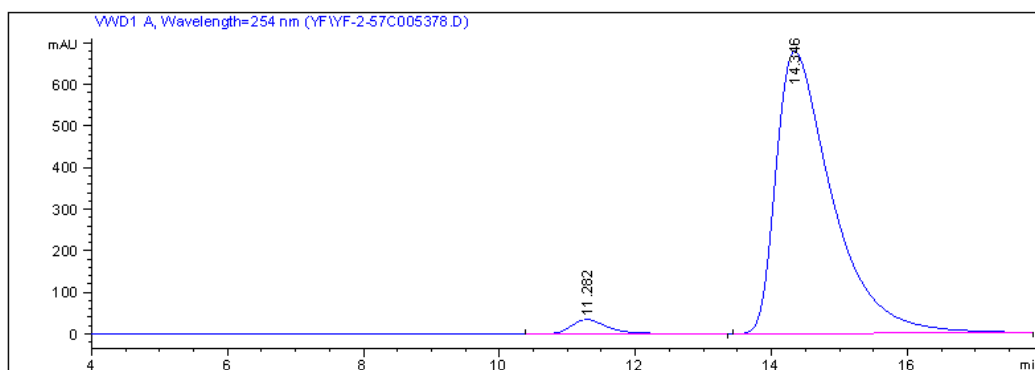

| Peak # | RetTime [min] | Type | Width [min] | Area [mAU*s] | Height [mAU] | Area %  |
|--------|---------------|------|-------------|--------------|--------------|---------|
| 1      | 11.282        | BB   | 0.5656      | 1295.53955   | 34.69836     | 3.2179  |
| 2      | 14.346        | BBA  | 0.8576      | 3.89655e4    | 678.94775    | 96.7821 |

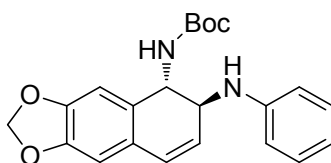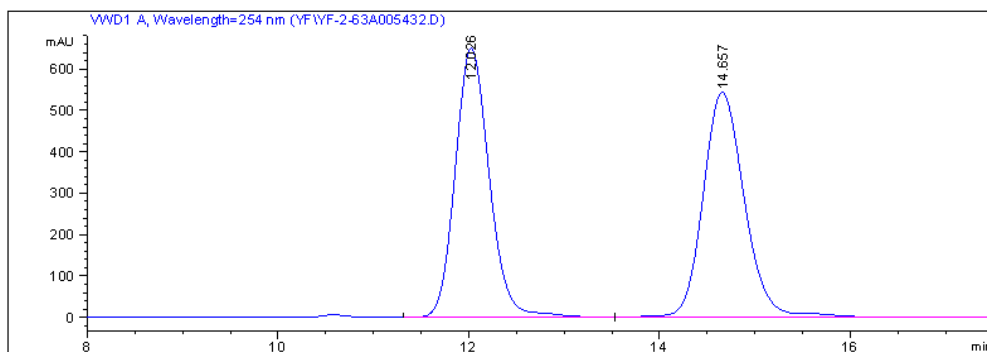

| Peak # | RetTime [min] | Type | Width [min] | Area [mAU*s] | Height [mAU] | Area %  |
|--------|---------------|------|-------------|--------------|--------------|---------|
| 1      | 12.026        | BB   | 0.3827      | 1.60808e4    | 649.78937    | 49.7183 |
| 2      | 14.657        | BBA  | 0.4632      | 1.62630e4    | 543.33582    | 50.2817 |

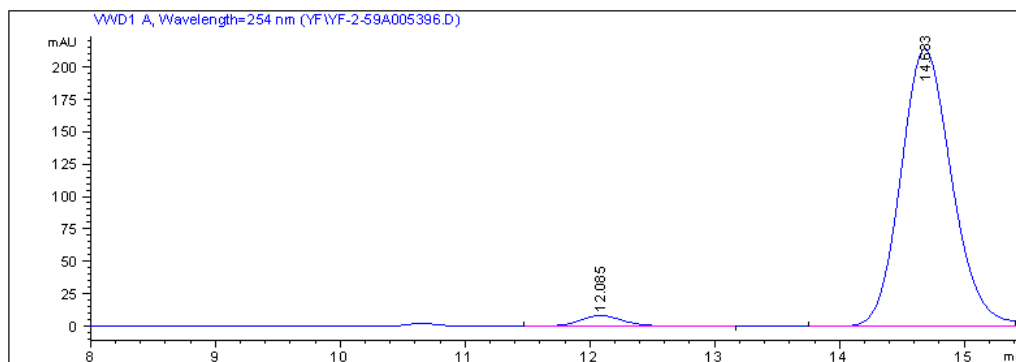

| Peak # | RetTime [min] | Type | Width [min] | Area [mAU*s] | Height [mAU] | Area %  |
|--------|---------------|------|-------------|--------------|--------------|---------|
| 1      | 12.085        | BB   | 0.3707      | 194.87715    | 8.15831      | 3.1259  |
| 2      | 14.683        | BV   | 0.4362      | 6039.41992   | 214.00836    | 96.8741 |

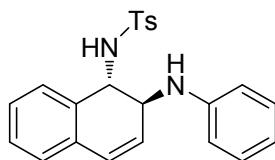

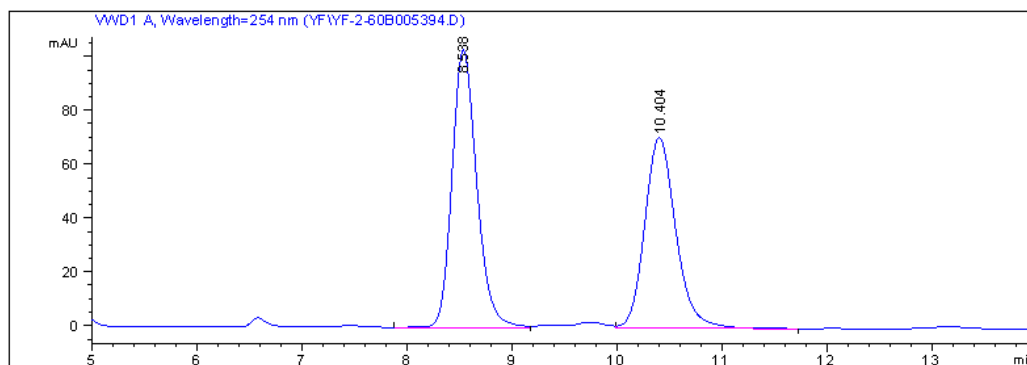

| Peak # | RetTime [min] | Type | Width [min] | Area [mAU* s] | Height [mAU] | Area %  |
|--------|---------------|------|-------------|---------------|--------------|---------|
| 1      | 8.538         | BV   | 0.2513      | 1693.56653    | 103.29844    | 53.7654 |
| 2      | 10.404        | VB   | 0.3160      | 1456.35425    | 70.80702     | 46.2346 |

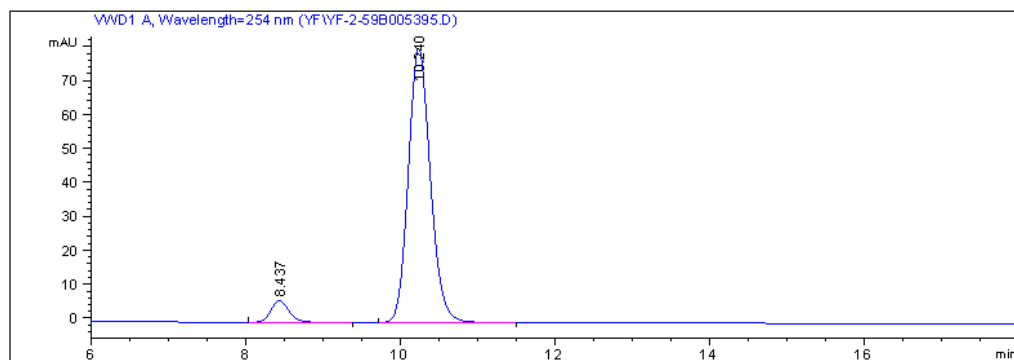

| # | [min]  | [min] | [mAU* s] | [mAU]      | %        |         |
|---|--------|-------|----------|------------|----------|---------|
| 1 | 8.437  | BB    | 0.2506   | 102.68209  | 6.31761  | 6.0303  |
| 2 | 10.240 | BB    | 0.3067   | 1600.09607 | 80.58021 | 93.9697 |

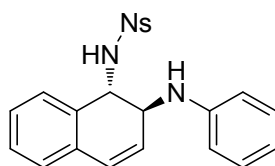

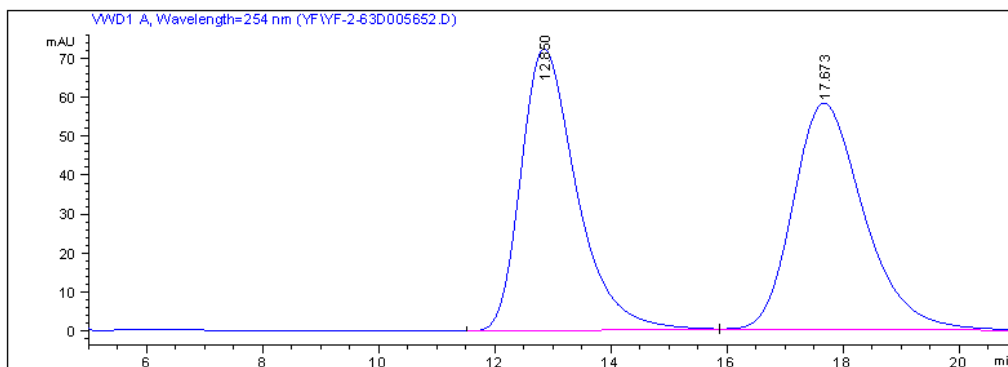

| Peak # | RetTime [min] | Type | Width [min] | Area [mAU*s] | Height [mAU] | Area %  |
|--------|---------------|------|-------------|--------------|--------------|---------|
| 1      | 12.850        | BB   | 1.0121      | 4814.90283   | 72.28268     | 49.4112 |
| 2      | 17.673        | BBA  | 1.2917      | 4929.65332   | 57.99320     | 50.5888 |

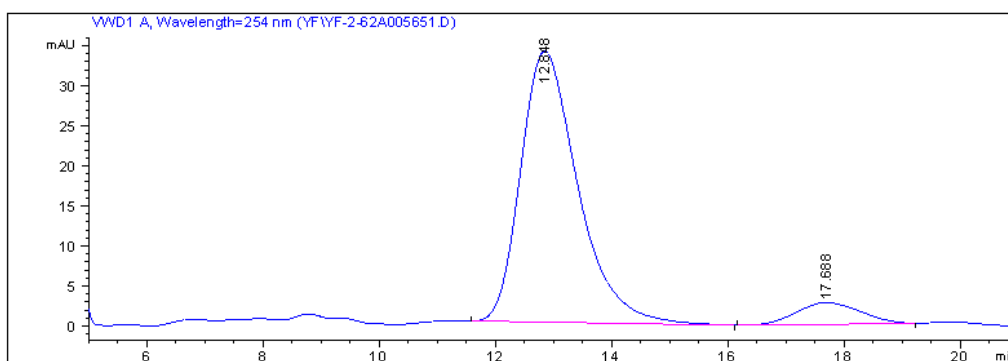

| Peak # | RetTime [min] | Type | Width [min] | Area [mAU*s] | Height [mAU] | Area %  |
|--------|---------------|------|-------------|--------------|--------------|---------|
| 1      | 12.848        | BB   | 1.0272      | 2311.25781   | 33.82497     | 91.8013 |
| 2      | 17.688        | BB   | 0.8936      | 206.41635    | 2.70096      | 8.1987  |

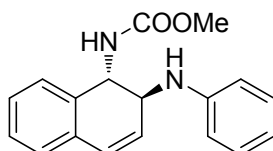

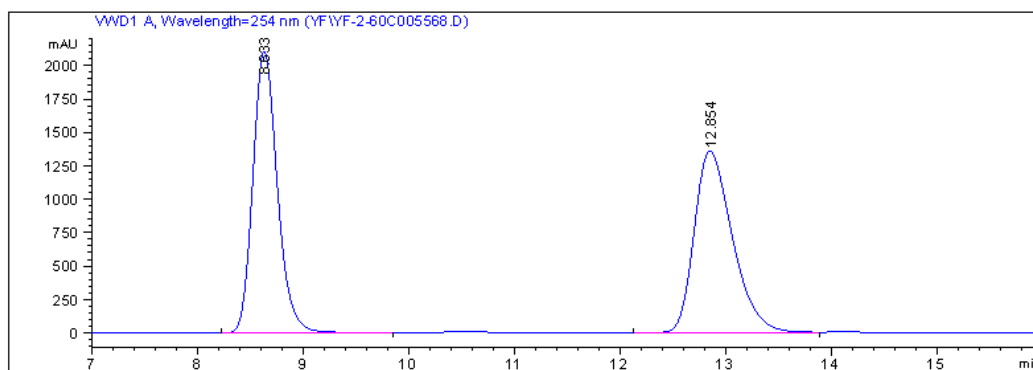

| Peak # | RetTime [min] | Type | Width [min] | Area [mAU*s] | Height [mAU] | Area %  |
|--------|---------------|------|-------------|--------------|--------------|---------|
| 1      | 8.633         | BB   | 0.2474      | 3.38764e4    | 2108.69263   | 49.7333 |
| 2      | 12.854        | BV   | 0.3901      | 3.42398e4    | 1358.12964   | 50.2667 |

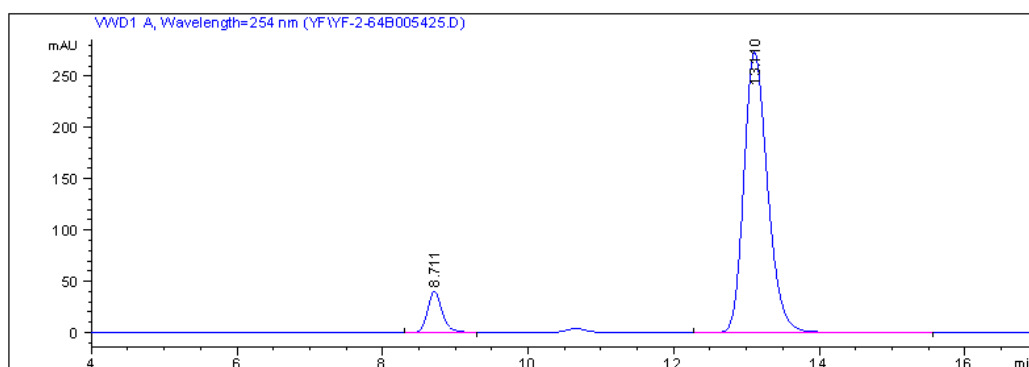

| Peak # | RetTime [min] | Type | Width [min] | Area [mAU*s] | Height [mAU] | Area %  |
|--------|---------------|------|-------------|--------------|--------------|---------|
| 1      | 8.711         | BV   | 0.2155      | 560.50543    | 39.98707     | 8.3019  |
| 2      | 13.110        | BB   | 0.3481      | 6191.01465   | 273.51895    | 91.6981 |

## E: Copies of NMR spectra

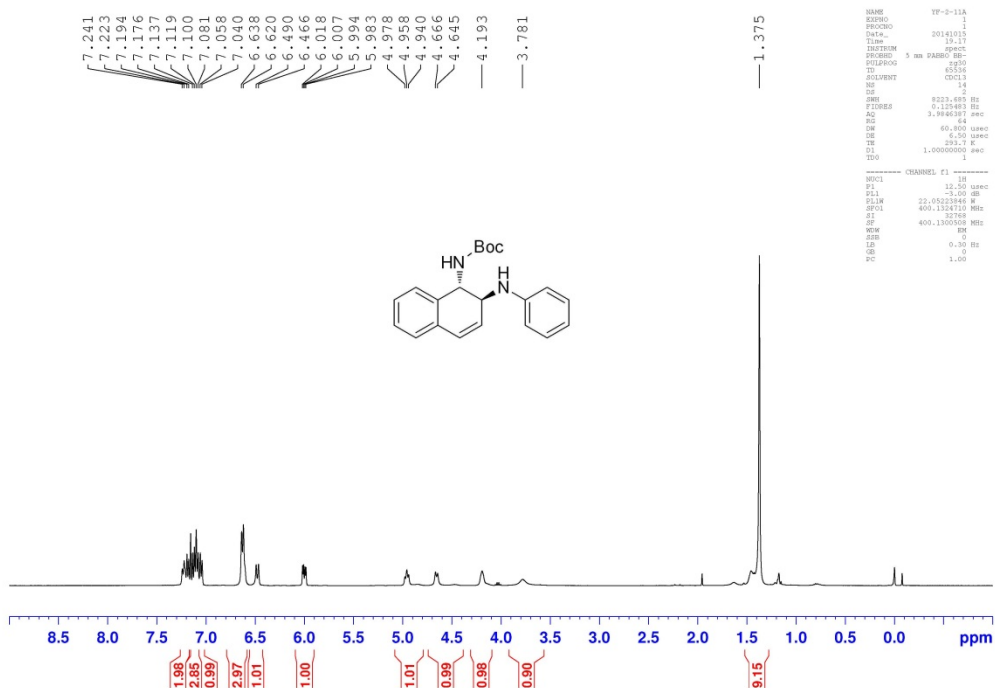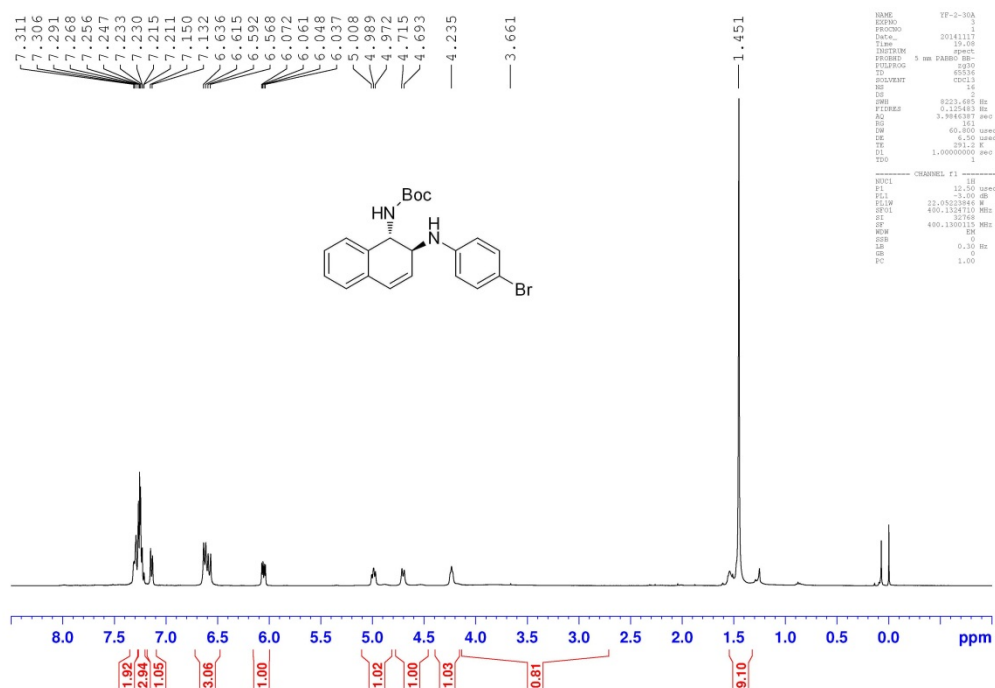



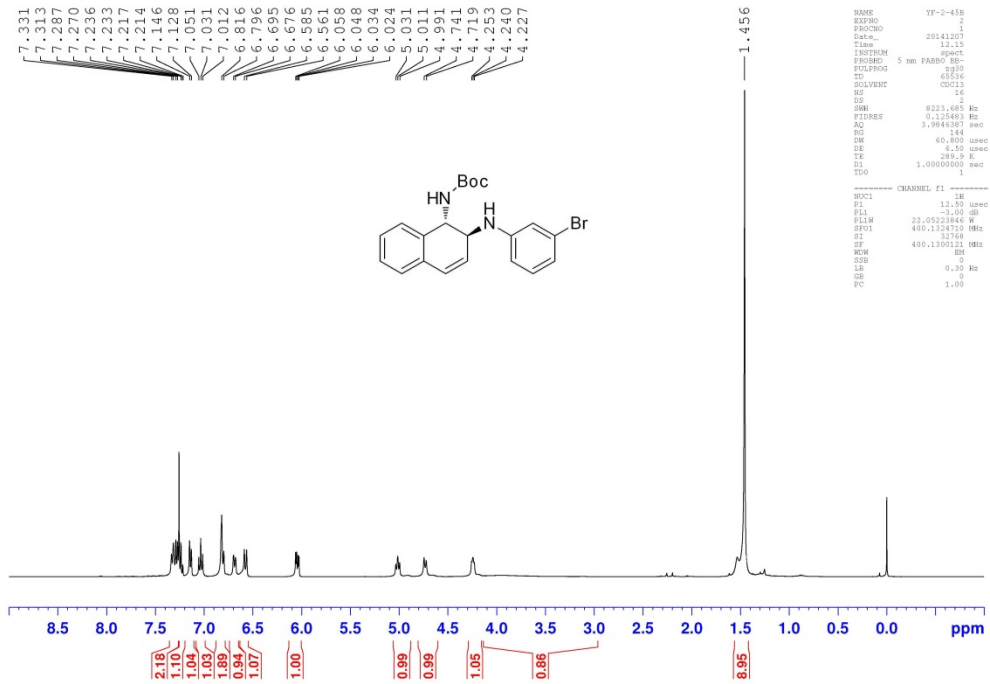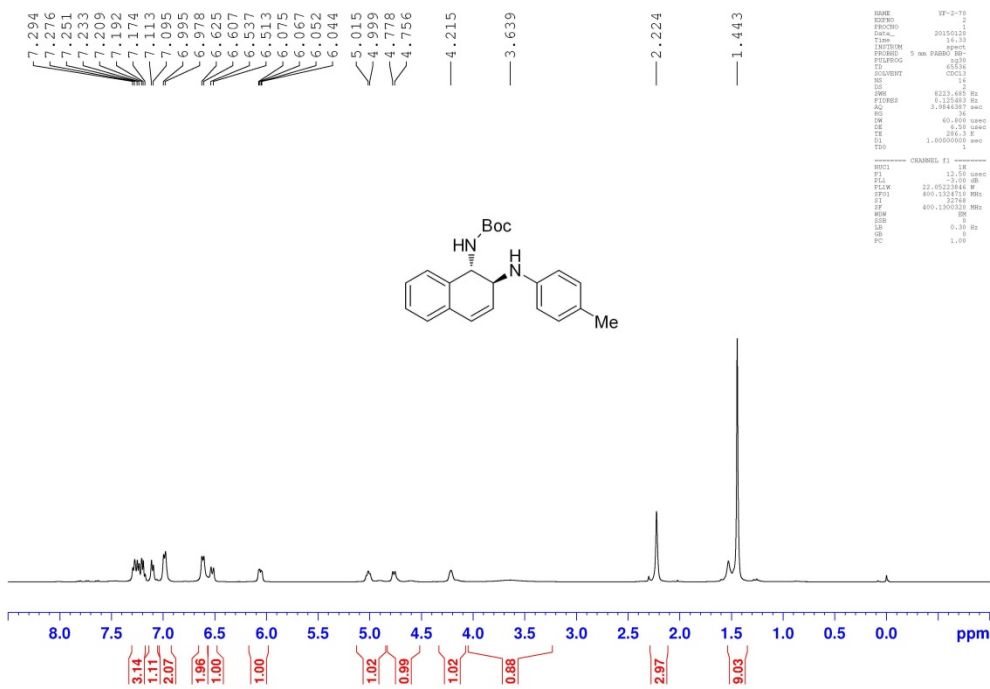

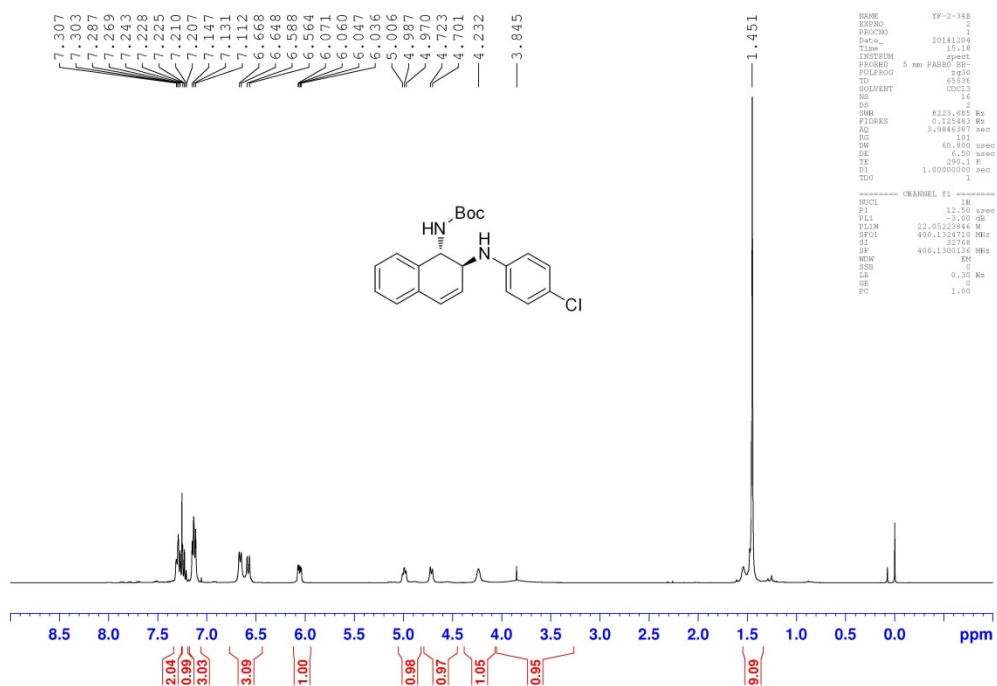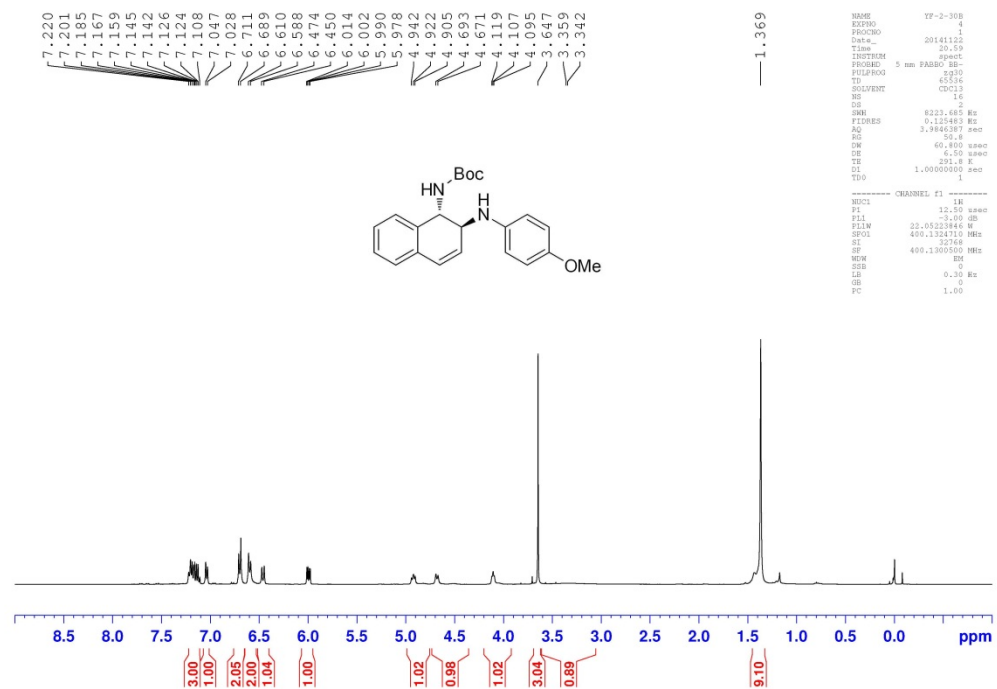

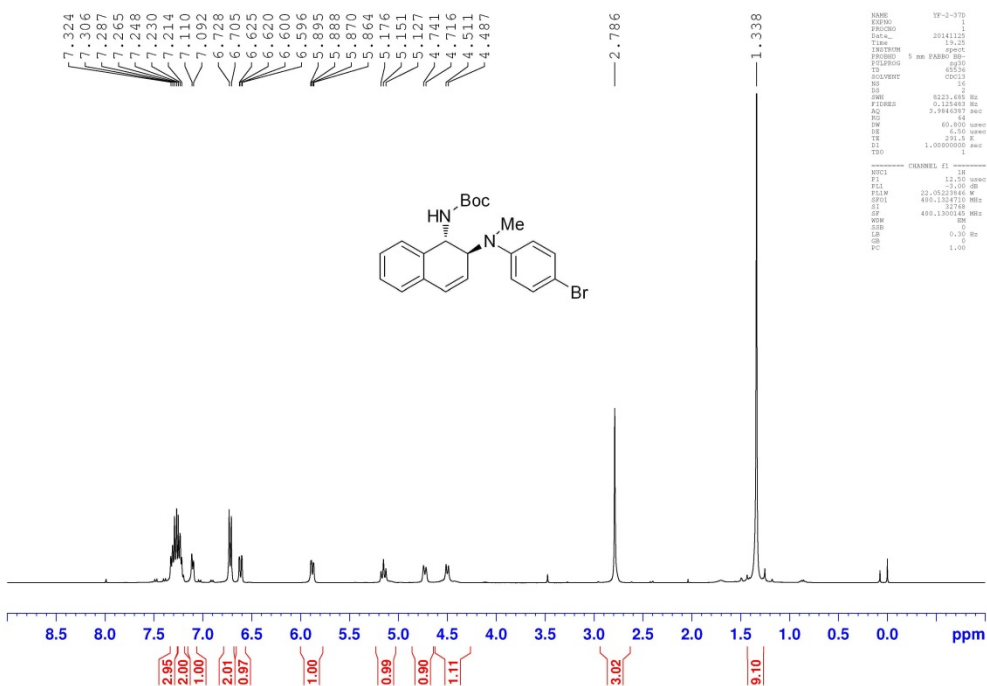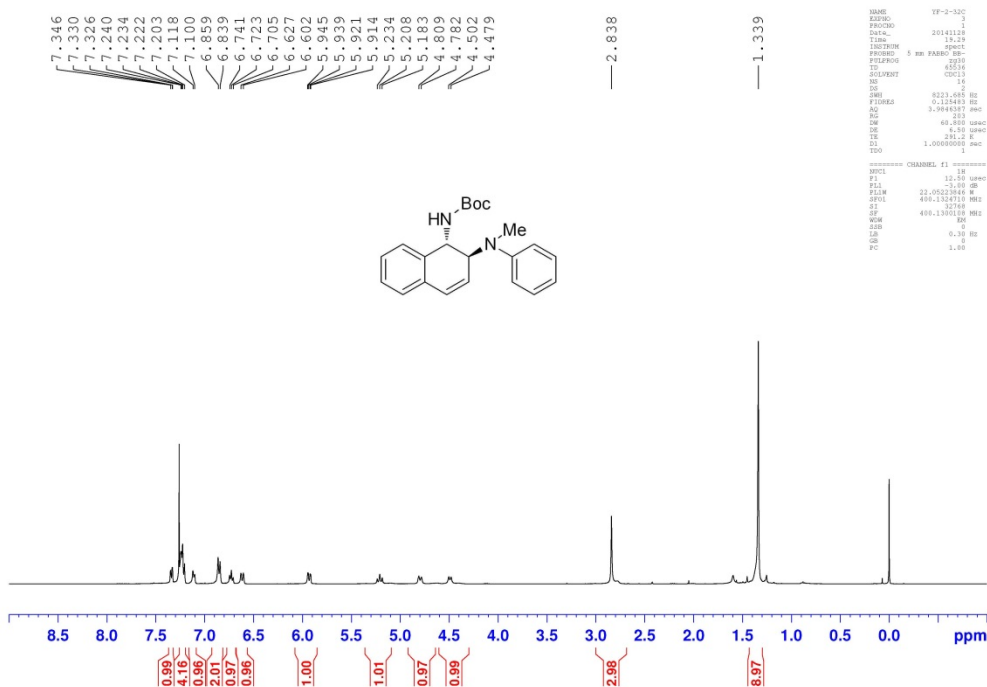

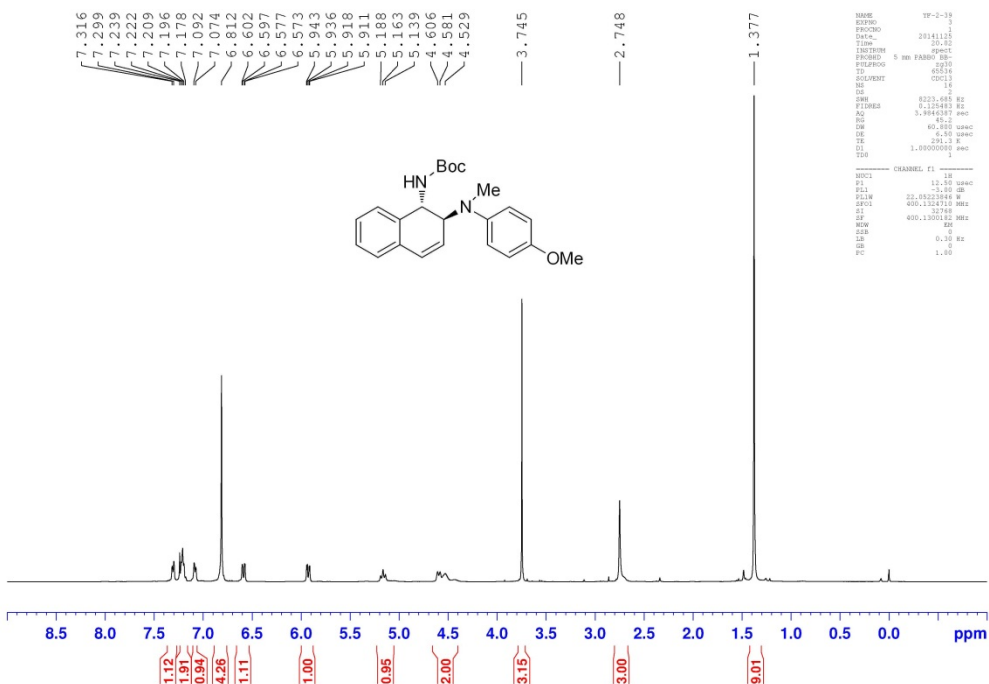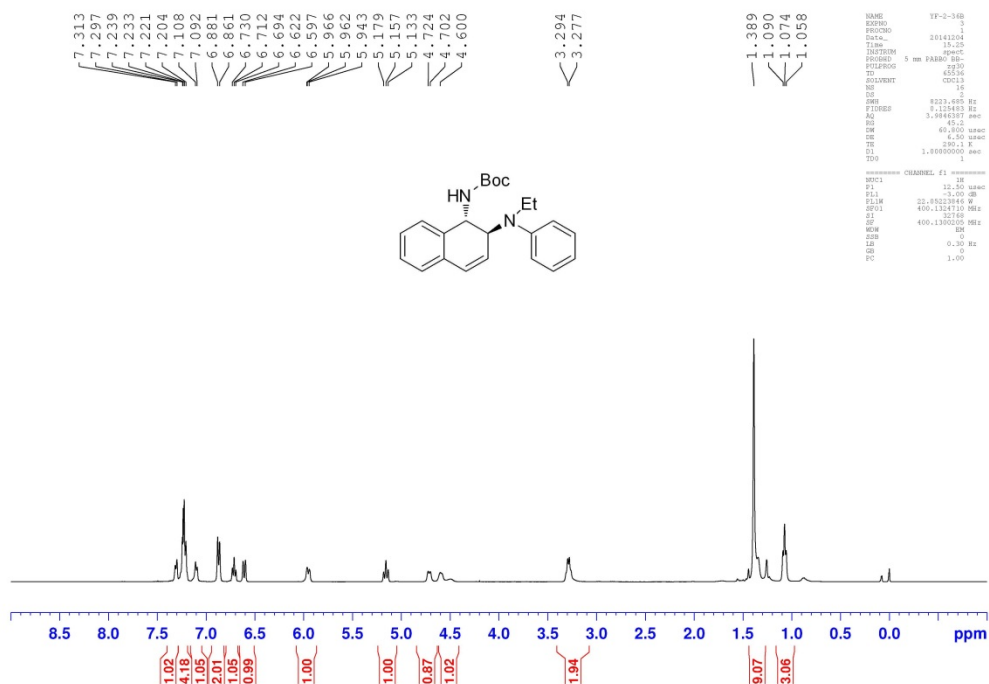

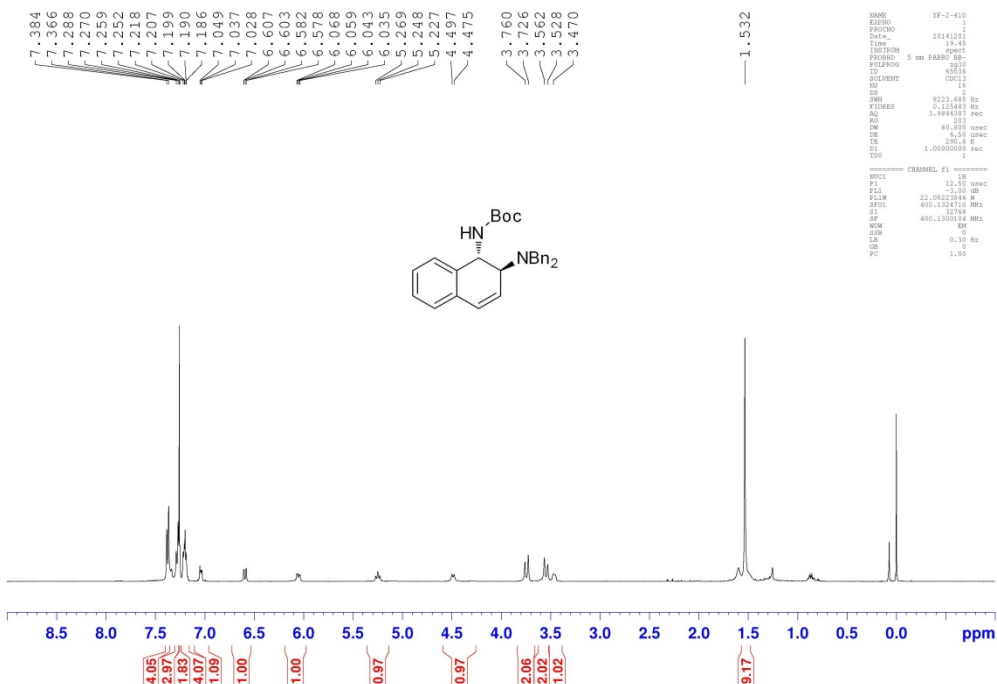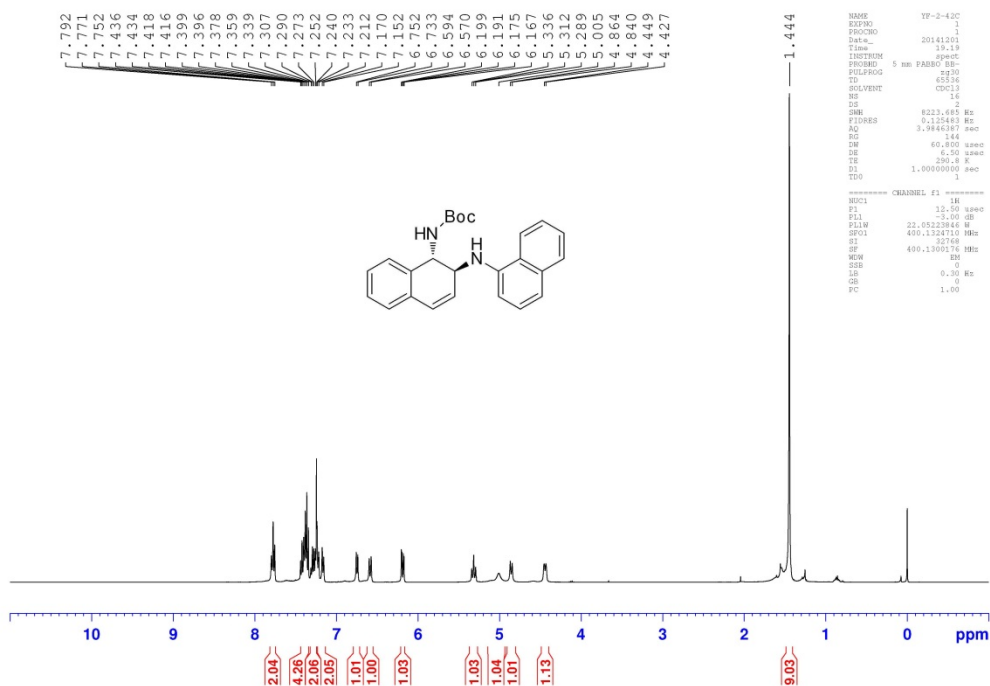

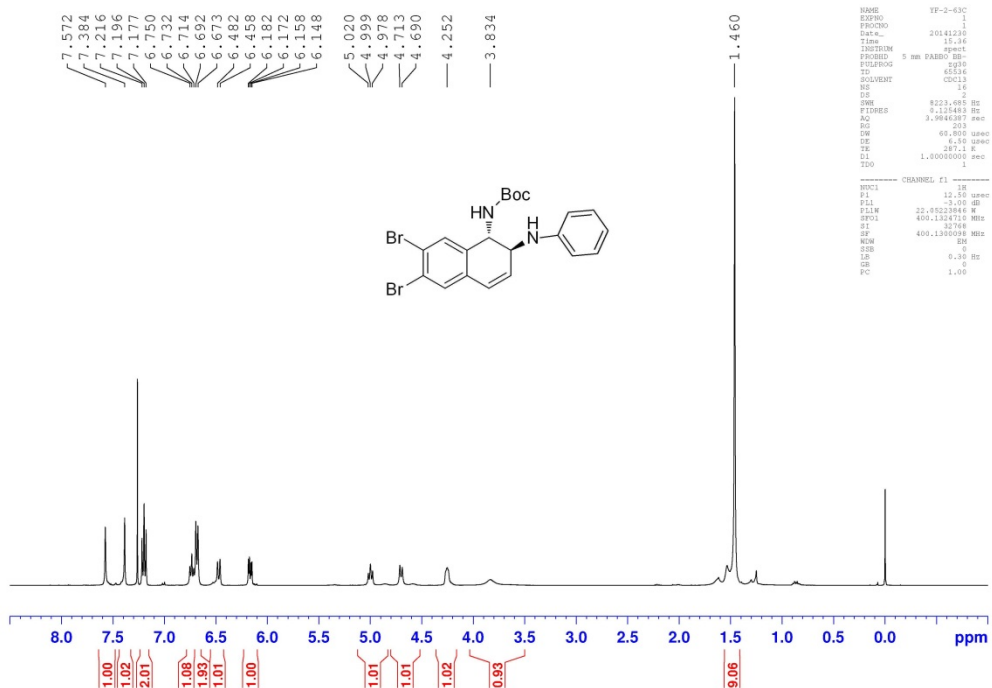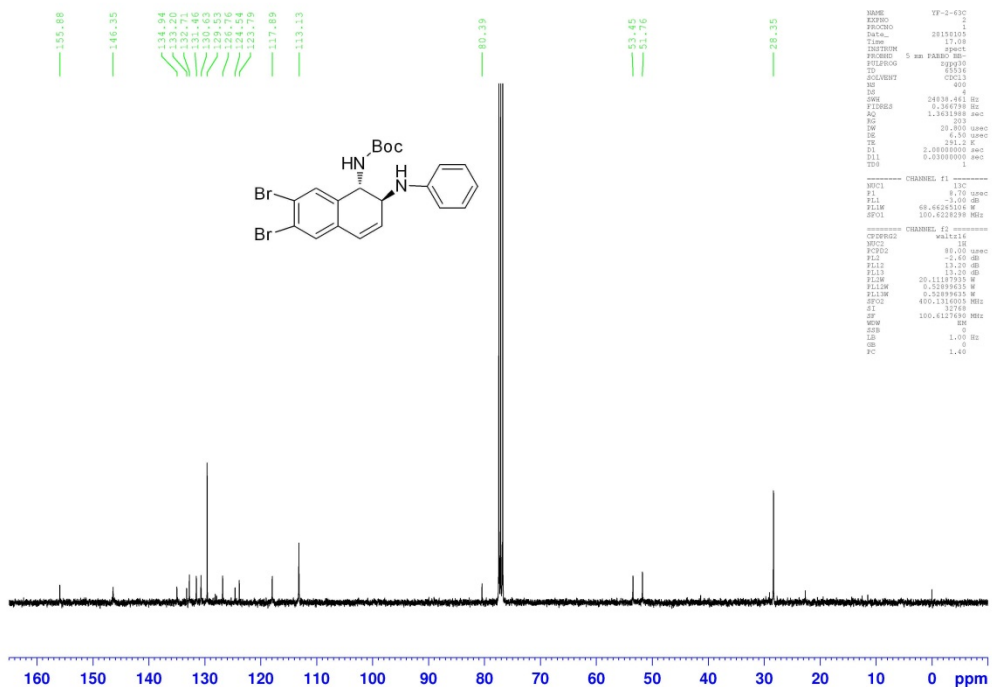

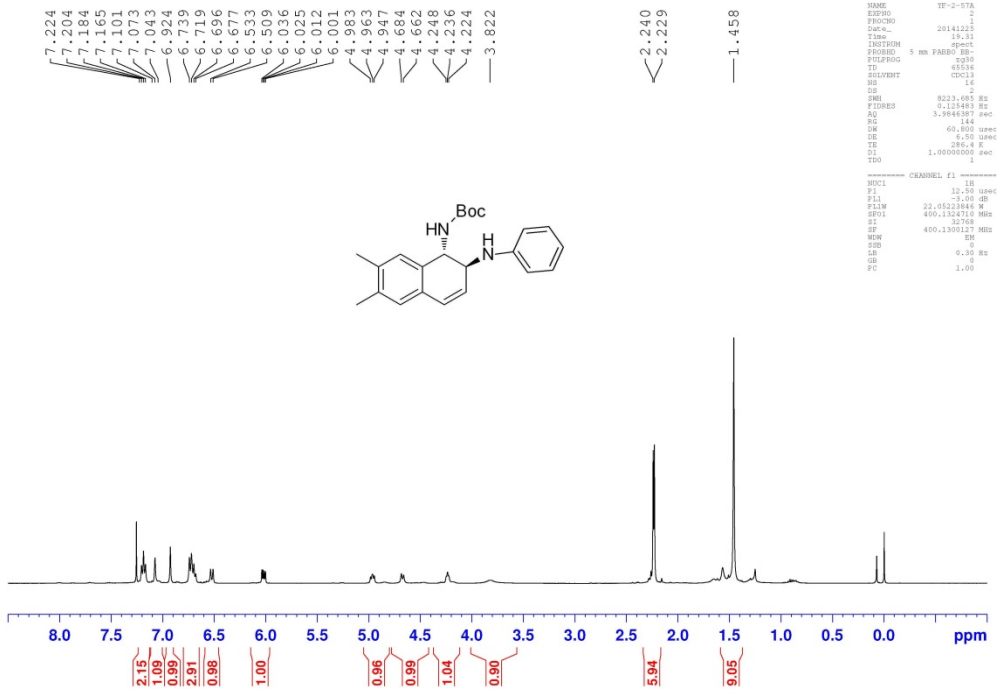

```

NAME          YE-2-57A
EXPNO         2
PROCNO        20141211
Date_         12.11.11
TIME          09:05
INSTRUM       spect
PROBHD        5 mm PABBO BB-
PULPROG       zgpg30
TD            65536
SOLVENT       CDCl3
AQ           1.0
RG            1.0
SI            1.0
SMI           8223.005 Hz
F2 (Hz)       81.25483 Hz
AQ           3.9844387 sec
RG            1.0
SI            1.0
SM           60.800 usec
F2 (Hz)       400.125765 MHz
AQ           32768
RG            1.0
SI            1.0
SM           0.90 usec
F2 (Hz)       400.130527 MHz
AQ           32768
RG            1.0
SI            1.0
SM           1.00
PC            1.00
    
```

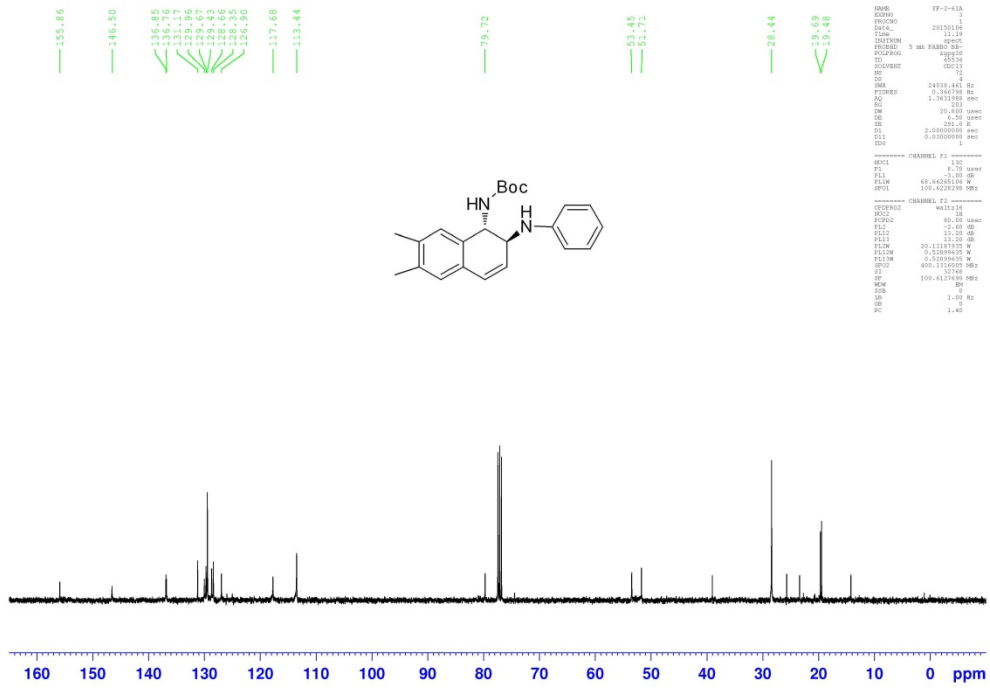

```

NAME          TP-2-41A
EXPNO         1
PROCNO        20120109
Date_         12.09.10
TIME          09:05
INSTRUM       spect
PROBHD        5 mm PABBO BB-
PULPROG       zgpg30
TD            65536
SOLVENT       CDCl3
AQ           1.0
RG            1.0
SI            1.0
SM           24930.442 Hz
F2 (Hz)       81.25483 Hz
AQ           3.9844387 sec
RG            1.0
SI            1.0
SM           20.800 usec
F2 (Hz)       400.125765 MHz
AQ           32768
RG            1.0
SI            1.0
SM           0.90 usec
F2 (Hz)       400.130527 MHz
AQ           32768
RG            1.0
SI            1.0
SM           1.00
PC            1.00
    
```

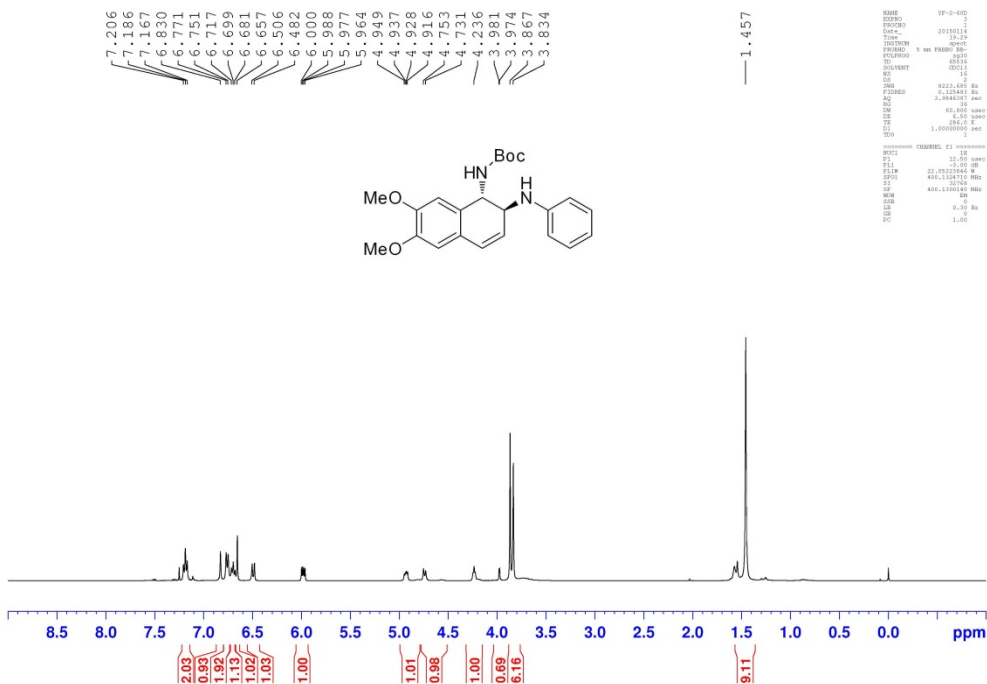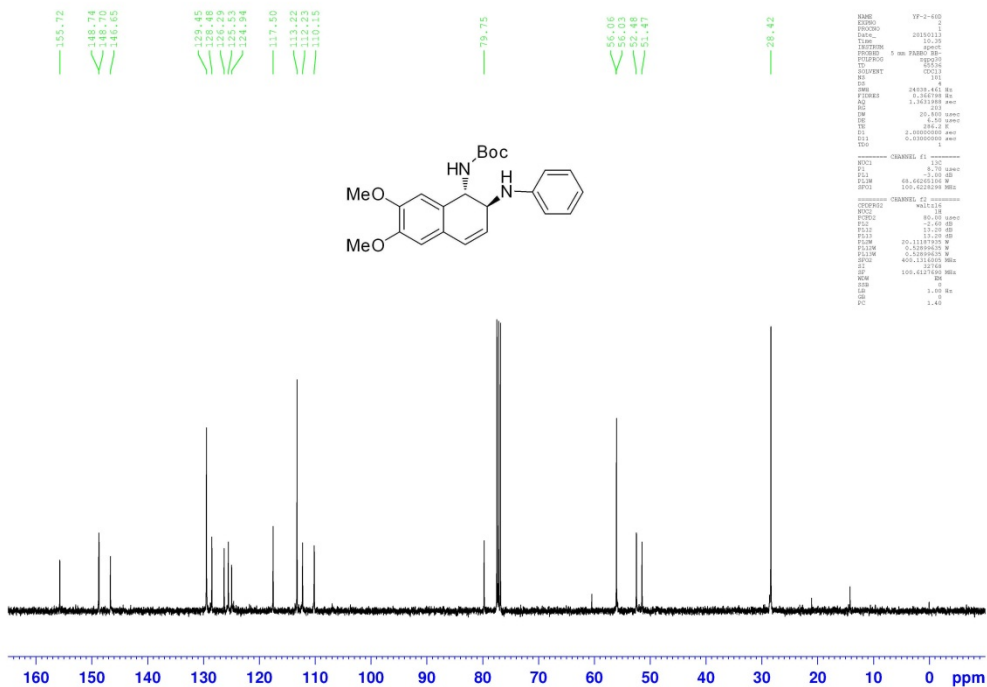



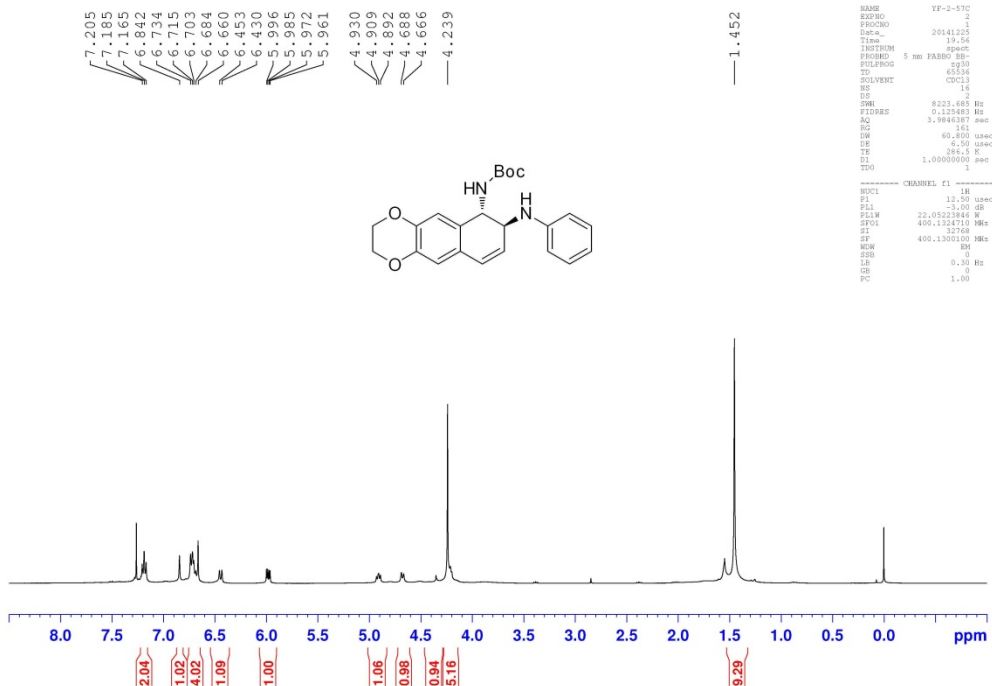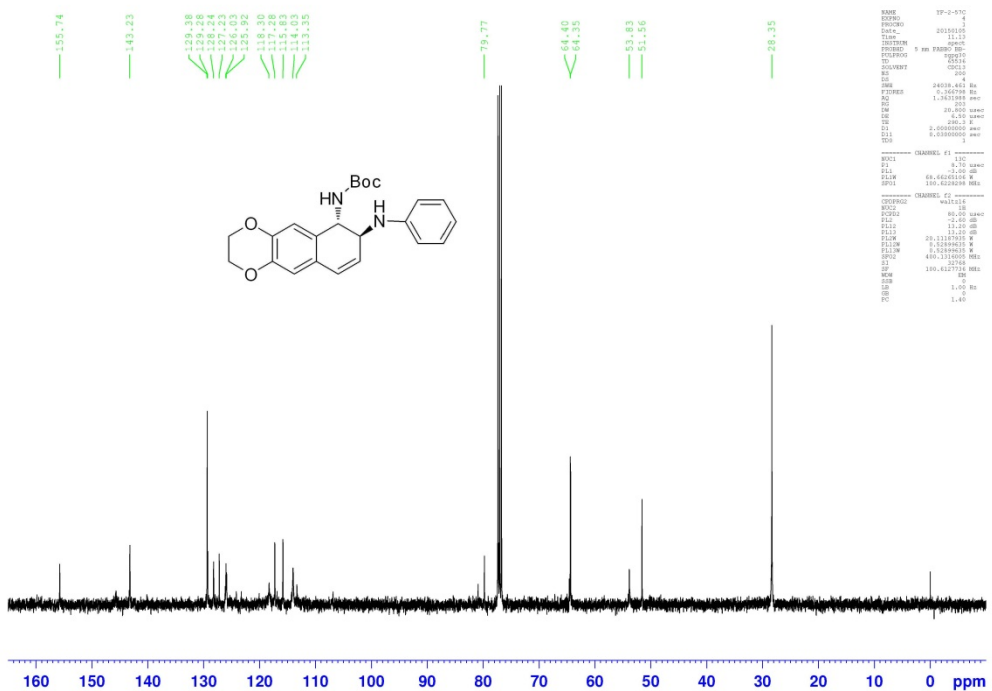

## 6-(methyl(phenyl)amino)-5,6-dihydronaphtho[2,3-d][1,3]dioxol-5-ol (3ia)

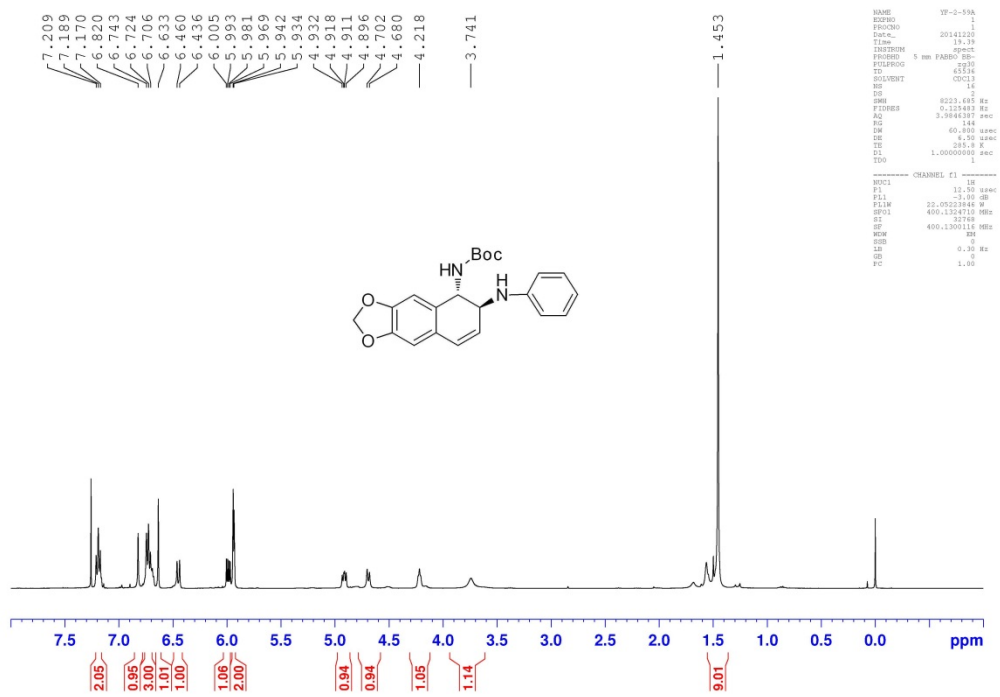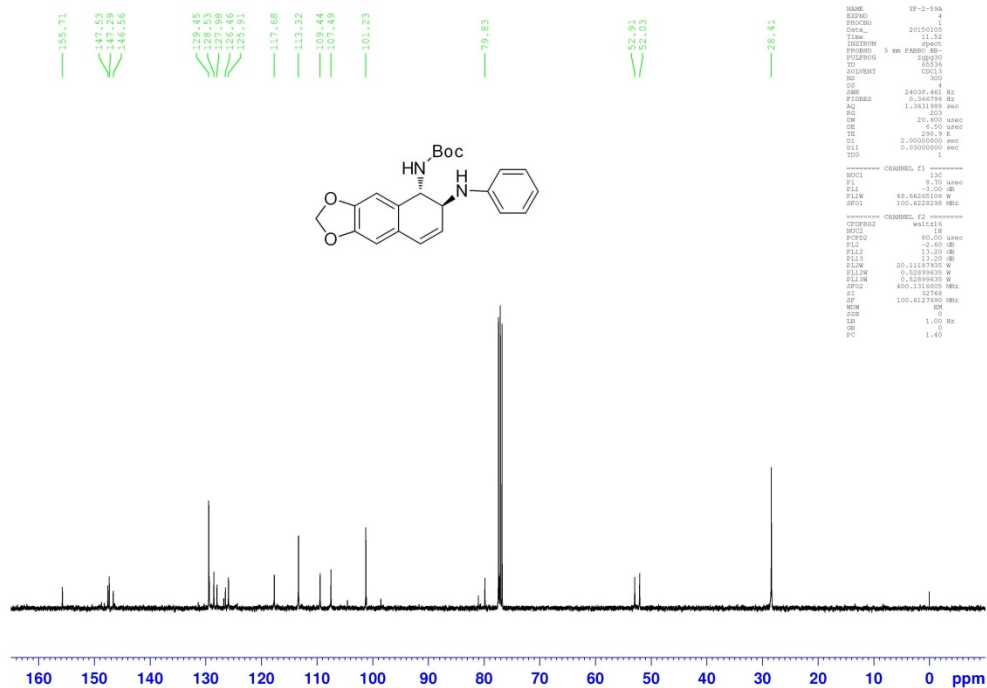

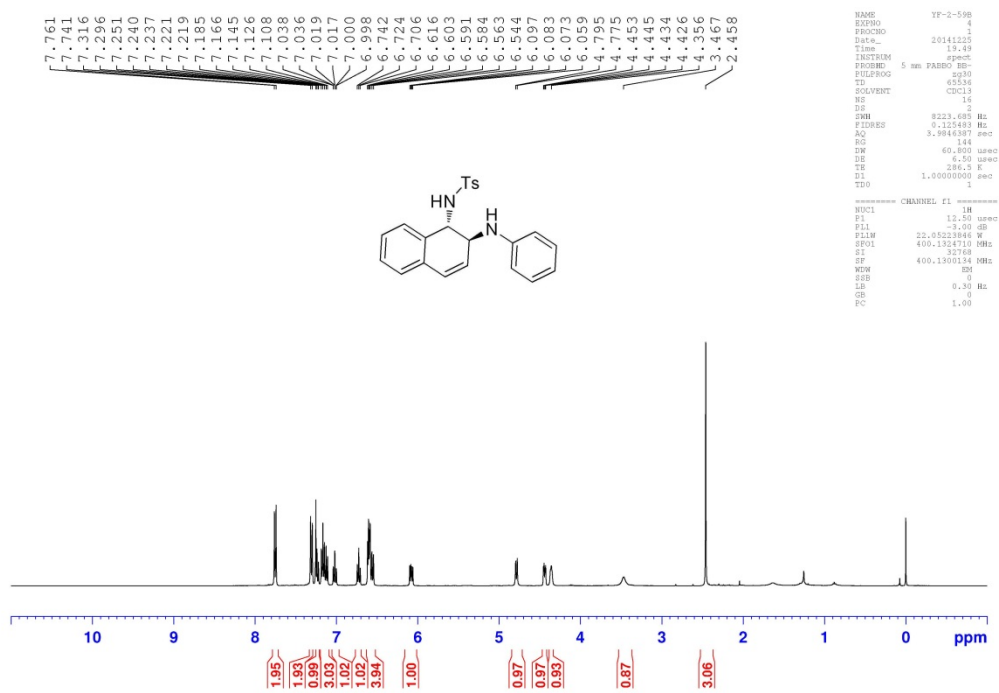

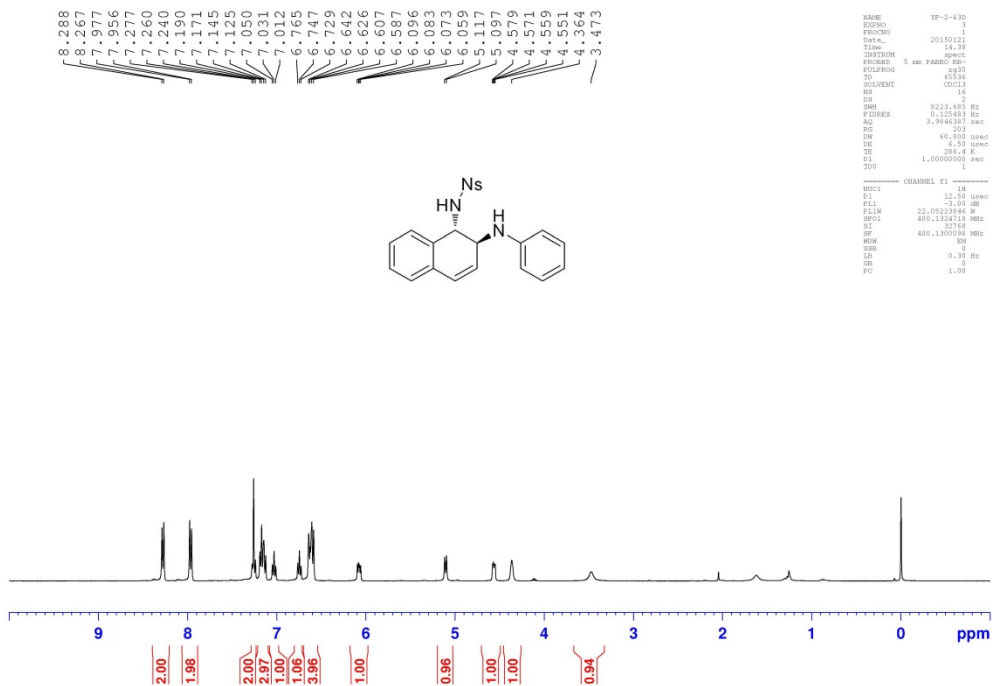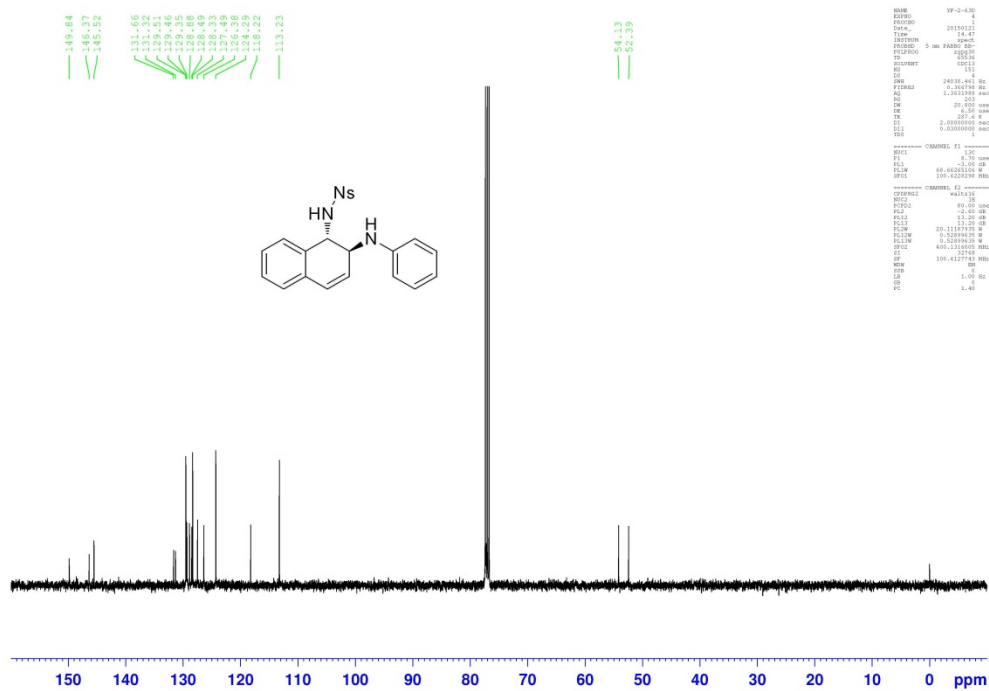

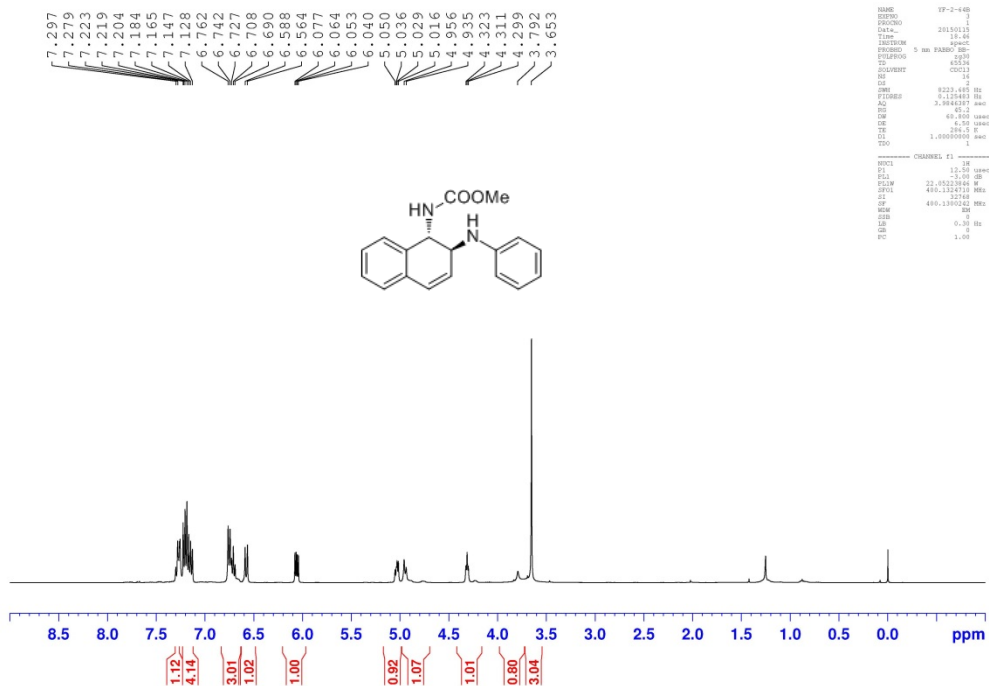

```
NAME IF-2-448
EXPNO 1
PROCNO 1
Date_ 20150115
TIME 15.40
INSTRUM spect
PROBHD 5 mm PABBO-5B
PULPROG zgpg30
SOLVENT CDCl3
NS 65518
DS 4
SWH 8223.482 Hz
FIDRES 0.125483 Hz
AQ 3.484237 sec
RG 60
SQ 69.950 usec
WDW EM
SSB 0
GB 0
TE 298.15 K
DQ 1.0000000 sec
TD 1
----- CHANNEL f1 -----
NUC1 13
P1 12.00 usec
PL1 -1.00 dB
SFO1 101.625199 MHz
NUC2 13
P2 12.00 usec
PL2 -1.00 dB
SFO2 101.625199 MHz
PC 1.00
```

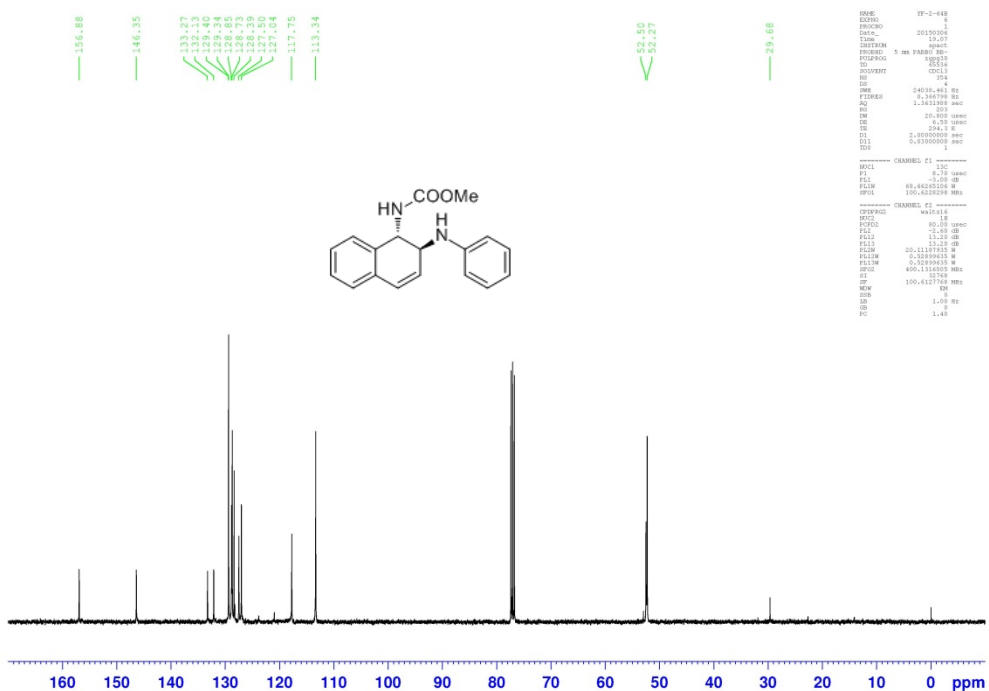

```
NAME IF-2-448
EXPNO 1
PROCNO 1
Date_ 20150115
TIME 15.40
INSTRUM spect
PROBHD 5 mm PABBO-5B
PULPROG zgpg30
SOLVENT CDCl3
NS 65518
DS 4
SWH 8223.482 Hz
FIDRES 0.125483 Hz
AQ 3.484237 sec
RG 60
SQ 69.950 usec
WDW EM
SSB 0
GB 0
TE 298.15 K
DQ 1.0000000 sec
TD 1
----- CHANNEL f1 -----
NUC1 13
P1 12.00 usec
PL1 -1.00 dB
SFO1 101.625199 MHz
----- CHANNEL f2 -----
NUC2 13
P2 12.00 usec
PL2 -1.00 dB
SFO2 101.625199 MHz
PC 1.00
```
